# Supplementary material
Source: Royal Society of Chemistry journal article supplement (doi:10.1039/d6fo01257d)
Supplement: d6fo01257d1.pdf [file d6fo01257d1.pdf]

| Peptide sequence    | -10lgP | Mass      | Length | ppm  | m/z      | RT    | Area A   | Scan  | PeptideRanker Score | Solubility | Toxicity           | Molecular weight |
|---------------------|--------|-----------|--------|------|----------|-------|----------|-------|---------------------|------------|--------------------|------------------|
| LLLLLLLLLLLLVVVVVVV | 55.44  | 2809.9771 | 26     | 6.4  | 937.6723 | 42.83 | 0        | 51750 | 0.9978              | Poor       | Non-Toxin (0.3400) | 2811.83          |
| VVVVVVVV            | 21.17  | 466.2216  | 4      | -9   | 467.2247 | 12.85 | 1.26E+07 | 14348 | 0.9929              | Good       | Non-Toxin (0.3050) | 466.54           |
| FGFP                | 20.17  | 279.1219  | 3      | 2.3  | 280.1298 | 6.33  | 2.9513E7 | 5507  | 0.9873              | Good       | Non-Toxin (0.2500) | 279.30           |
| GGF                 | 26.04  | 375.2158  | 3      | 1.5  | 376.2236 | 22.99 | 5.7758E7 | 26323 | 0.9767              | Good       | Toxin (0.5900)     | 375.47           |
| LGPF                | 26.19  | 432.2372  | 4      | 3.1  | 433.2458 | 30.72 | 4.2224E7 | 35728 | 0.9699              | Good       | Toxin (0.4100)     | 432.52           |
| APF                 | 26.33  | 333.1688  | 3      | 1.2  | 334.1765 | 26.38 | 1.2141E7 | 30621 | 0.9670              | Good       | Non-Toxin (0.3650) | 333.39           |
| APPPPPP             | 29.91  | 671.3642  | 7      | 3.4  | 672.3738 | 16.47 | 7.3914E7 | 17567 | 0.9623              | Good       | Toxin (0.6450)     | 671.79           |
| IGPF                | 26.19  | 432.2372  | 4      | 3.1  | 433.2458 | 30.72 | 4.2224E7 | 35728 | 0.9570              | Good       | Toxin (0.4000)     | 432.52           |
| SFPF                | 23.06  | 446.2165  | 4      | -0.6 | 447.2235 | 22.24 | 1.3028E5 | 25368 | 0.9527              | Good       | Non-Toxin (0.3650) | 446.50           |
| FPA                 | 22.94  | 333.1688  | 3      | 1.2  | 334.1765 | 16.02 | 3.0534E6 | 17596 | 0.9515              | Good       | Non-Toxin (0.2900) | 333.39           |
| VPPPPPPPG           | 22.7   | 853.4697  | 9      | 1.8  | 427.7429 | 21    | 1.3933E6 | 23590 | 0.9570              | Poor       | Toxin (0.5750)     | 854.02           |
| PAPPPPP             | 26.82  | 671.3642  | 7      | -0.2 | 336.6893 | 16.3  | 6.4355E7 | 18056 | 0.9499              | Good       | Toxin (0.6100)     | 671.79           |
| IPPPPPPP            | 24.96  | 810.4639  | 8      | 3.7  | 406.2407 | 26.11 | 8.5237E6 | 29953 | 0.9496              | Moderate   | Toxin (0.6850)     | 810.99           |
| LGFP                | 25.27  | 432.2372  | 4      | 3.1  | 433.2458 | 30.72 | 4.7834E7 | 36034 | 0.9460              | Good       | Non-Toxin (0.3150) | 432.52           |
| LFL                 | 24.91  | 391.2471  | 3      | 3.4  | 392.2557 | 33.95 | 7.975E7  | 41911 | 0.9446              | Good       | Non-Toxin (0.3450) | 391.51           |
| LPPPPPP             | 24.96  | 810.4639  | 8      | 3.7  | 406.2407 | 26.11 | 8.5237E6 | 29953 | 0.9425              | Moderate   | Toxin (0.6050)     | 810.99           |
| LLF                 | 23.7   | 391.2471  | 3      | 3.2  | 392.2556 | 35.8  | 7.7802E7 | 42297 | 0.9389              | Good       | Toxin (0.5600)     | 391.51           |
| APPPP               | 30     | 477.2587  | 5      | 2.7  | 478.2673 | 10.77 | 5.5403E6 | 9760  | 0.9304              | Good       | Toxin (0.6300)     | 477.56           |
| LPPPPP              | 26.89  | 616.3584  | 6      | 3.9  | 617.3681 | 21.4  | 8.3399E6 | 23871 | 0.9259              | Good       | Toxin (0.6100)     | 616.76           |
| MPLP                | 20.43  | 456.2406  | 4      | -0.2 | 457.2478 | 27.69 | 3.6055E6 | 31986 | 0.9257              | Good       | Toxin (0.6150)     | 456.61           |
| LPPPP               | 25.52  | 519.3057  | 5      | 3.6  | 520.3148 | 20.26 | 3.4405E7 | 22242 | 0.9253              | Good       | Toxin (0.6250)     | 519.64           |
| PPGP                | 21.17  | 366.1903  | 4      | -2.7 | 367.1966 | 21.15 | 5.2978E6 | 24273 | 0.9250              | Good       | Toxin (0.7650)     | 366.42           |
| IPPPPP              | 26.89  | 616.3584  | 6      | 3.9  | 617.3681 | 21.4  | 8.3399E6 | 23871 | 0.9239              | Good       | Toxin (0.6650)     | 616.76           |
| MPL                 | 21.3   | 359.1879  | 3      | 0.8  | 360.1954 | 21.63 | 2.2332E7 | 24834 | 0.9224              | Good       | Toxin (0.4250)     | 359.49           |
| VPPPPPP             | 23.75  | 699.3955  | 7      | -2.7 | 350.7041 | 19.64 | 3.9476E6 | 21648 | 0.9154              | Good       | Toxin (0.4250)     | 699.85           |
| IPPPP               | 25.52  | 519.3057  | 5      | 3.6  | 520.3148 | 20.26 | 3.4405E7 | 22242 | 0.9083              | Good       | Toxin (0.6700)     | 519.64           |
| KFP                 | 22     | 390.2267  | 3      | 8.6  | 391.2373 | 6.69  | 9.6397E5 | 5407  | 0.8980              | Good       | Toxin (0.5550)     | 390.48           |
| LPPP                | 26.07  | 422.2529  | 4      | -0.4 | 423.26   | 25.94 | 1.2023E8 | 30426 | 0.8966              | Good       | Toxin (0.6300)     | 422.52           |
| ARFL                | 21.29  | 505.3012  | 4      | -1.5 | 506.3077 | 25.38 | 3.1338E7 | 30608 | 0.8949              | Good       | Non-Toxin (0.1050) | 505.62           |
| DLF                 | 22.83  | 393.19    | 3      | 2.1  | 394.1981 | 31.15 | 3.0788E7 | 37099 | 0.8931              | Good       | Non-Toxin (0.1900) | 393.44           |
| PAPP                | 27.87  | 477.2587  | 5      | 2.7  | 478.2673 | 10.77 | 5.5403E6 | 9828  | 0.8918              | Good       | Toxin (0.5850)     | 477.56           |
| KFPL                | 26.29  | 503.3107  | 4      | 0.7  | 504.3184 | 23.33 | 3.3061E7 | 26878 | 0.8895              | Good       | Toxin (0.6850)     | 503.64           |
| LFAM                | 22.15  | 480.2406  | 4      | 3.2  | 481.2494 | 32.77 | 5.8636E5 | 38744 | 0.8842              | Good       | Non-Toxin (0.1850) | 480.63           |
| LLF                 | 22.06  | 504.3311  | 4      | 2    | 505.3394 | 43.44 | 6.2814E5 | 52505 | 0.8841              | Good       | Toxin (0.5650)     | 504.67           |
| NLF                 | 25.27  | 392.206   | 3      | 2.1  | 393.2141 | 27.4  | 1.1935E7 | 31536 | 0.8827              | Good       | Non-Toxin (0.2800) | 392.46           |
| RAFP                | 21.58  | 489.2699  | 4      | 0.7  | 490.2775 | 18.24 | 7.8353E7 | 18859 | 0.8825              | Good       | Non-Toxin (0.3300) | 489.57           |
| TPF                 | 23.92  | 363.1794  | 3      | 0.6  | 364.1869 | 18.66 | 5.2477E7 | 20716 | 0.8818              | Good       | Non-Toxin (0.2950) | 363.41           |
| PLPP                | 23.35  | 422.2529  | 4      | 1.5  | 423.2608 | 15.86 | 6.652E7  | 19622 | 0.8767              | Good       | Toxin (0.7700)     | 422.52           |
| LAF                 | 26.22  | 349.2001  | 3      | 1.2  | 350.2078 | 25.49 | 1.1191E8 | 29620 | 0.8701              | Good       | Non-Toxin (0.2750) | 349.43           |
| IPPP                | 26.07  | 422.2529  | 4      | -0.4 | 423.26   | 25.94 | 1.2023E8 | 30426 | 0.8666              | Good       | Toxin (0.6900)     | 422.52           |
| YPVW                | 21.97  | 563.2744  | 4      | 2.5  | 564.283  | 32.93 | 6.901E5  | 39086 | 0.8619              | Good       | Toxin (0.3850)     | 563.65           |
| PLP                 | 21.79  | 325.2001  | 3      | 1.1  | 326.2078 | 14.1  | 4.9925E8 | 17169 | 0.8600              | Good       | Toxin (0.8000)     | 325.41           |
| LPPL                | 22.63  | 438.2842  | 4      | 2.5  | 439.2925 | 27.67 | 9.7343E7 | 31326 | 0.8576              | Good       | Toxin (0.7800)     | 438.57           |
| AEPppppp            | 21.33  | 800.4068  | 8      | 0.5  | 401.2109 | 18.02 | 1.1559E7 | 19872 | 0.8566              | Good       | Non-Toxin (0.3300) | 800.91           |
| FTP                 | 25.63  | 363.1794  | 3      | 0.6  | 364.1869 | 18.66 | 5.2477E7 | 21878 | 0.8452              | Good       | Non-Toxin (0.2200) | 363.41           |
| PAEppppp            | 20.17  | 800.4068  | 8      | 0.5  | 401.2109 | 18.02 | 1.1559E7 | 20110 | 0.8443              | Good       | Non-Toxin (0.3400) | 800.91           |
| MGLL                | 23.07  | 432.2406  | 4      | -4.9 | 433.2458 | 26.4  | 4.0676E7 | 30777 | 0.8426              | Good       | Non-Toxin (0.3350) | 432.58           |
| SPPL                | 20.3   | 412.2322  | 4      | 2.5  | 413.2405 | 16.42 | 1.1461E8 | 17648 | 0.8412              | Good       | Toxin (0.5550)     | 412.49           |
| LDf                 | 25.47  | 393.19    | 3      | 2.1  | 394.1981 | 29.24 | 3.0788E7 | 33548 | 0.8395              | Good       | Non-Toxin (0.2000) | 393.44           |
| LGDF                | 24.5   | 450.2114  | 4      | 0.1  | 451.2188 | 27.37 | 2.4153E7 | 32997 | 0.8378              | Good       | Non-Toxin (0.1250) | 450.49           |
| GGGL                | 22.34  | 302.159   | 4      | 1.5  | 303.1667 | 1.51  | 4.3878E7 | 1011  | 0.8328              | Good       | Non-Toxin (0.2600) | 302.33           |
| IGDF                | 24.5   | 450.2114  | 4      | 0.1  | 451.2188 | 27.37 | 2.4153E7 | 32997 | 0.8316              | Good       | Non-Toxin (0.1050) | 450.49           |
| GVGF                | 24.89  | 378.1903  | 4      | 2.2  | 379.1984 | 21.78 | 1.4302E6 | 24729 | 0.8300              | Good       | Toxin (0.5700)     | 378.43           |
| VGF                 | 23.54  | 321.1688  | 3      | 5.5  | 322.1779 | 19.9  | 3.2782E7 | 22010 | 0.8298              | Good       | Toxin (0.5250)     | 321.38           |
| LPP                 | 22.92  | 325.2001  | 3      | 1.3  | 326.2078 | 28.33 | 5.1075E8 | 32332 | 0.8280              | Good       | Toxin (0.6450)     | 325.41           |
| FVP                 | 24.3   | 361.2001  | 3      | 2.5  | 362.2083 | 20.62 | 1.9703E7 | 23902 | 0.8279              | Good       | Non-Toxin (0.2500) | 361.44           |
| IPPPAP              | 22.81  | 590.3428  | 6      | 1.6  | 296.1791 | 20.59 | 3.5498E6 | 22943 | 0.8209              | Good       | Toxin (0.5950)     | 590.72           |
| SPAEPppppp          | 23.96  | 984.4916  | 10     | 1    | 493.2535 | 20.51 | 1.9032E7 | 23465 | 0.8206              | Good       | Toxin (0.3900)     | 985.10           |
| SPAEPpppppAP        | 21.73  | 1152.5814 | 12     | 3.2  | 577.2998 | 24.45 | 4.7586E6 | 28205 | 0.8204              | Moderate   | Non-Toxin (0.3400) | 1153.30          |
| ISGF                | 26.86  | 422.2165  | 4      | 0.8  | 423.2242 | 23.36 | 2.0807E7 | 26575 | 0.8178              | Good       | Non-Toxin (0.2100) | 422.48           |
| RKSFLPPPP           | 20.95  | 1037.6022 | 9      | 2.6  | 519.8097 | 19.98 | 0        | 22242 | 0.8101              | Good       | Toxin (0.5300)     | 1038.26          |
| SPLP                | 22.43  | 412.2322  | 4      | 4.9  | 413.2415 | 18.82 | 6.7914E7 | 21514 | 0.7995              | Good       | Toxin (0.6900)     | 412.49           |
| FLPS                | 21.32  | 462.2478  | 4      | 4.3  | 463.2571 | 21.23 | 6.4775E7 | 23916 | 0.7958              | Good       | Toxin (0.5350)     | 462.55           |
| LPPAP               | 20.29  | 493.29    | 5      | 2.3  | 494.2984 | 19.5  | 1.05E7   | 22224 | 0.7925              | Good       | Toxin (0.4700)     | 493.60           |
| SPAEPpppppAPA       | 33.06  | 1223.6185 | 13     | 2.2  | 612.8179 | 23.86 | 1.7732E7 | 27342 | 0.7872              | Poor       | Non-Toxin (0.3200) | 1224.38          |
| PSPP                | 22.56  | 396.2009  | 4      | -3.9 | 397.2066 | 14.62 | 6.0602E6 | 15634 | 0.7830              | Good       | Toxin (0.5200)     | 396.44           |
| QSPppppA            | 21.26  | 692.3493  | 7      | 5.8  | 347.1839 | 22.47 | 0        | 25729 | 0.7824              | Good       | Toxin (0.5150)     | 692.77           |
| PVPPP               | 22.91  | 505.29    | 5      | 0.4  | 253.6524 | 16.21 | 0        | 17355 | 0.7798              | Good       | Non-Toxin (0.3550) | 505.61           |
| VAPF                | 22.98  | 432.2372  | 4      | 2.7  | 433.2457 | 24.04 | 1.207E8  | 27730 | 0.7755              | Good       | Non-Toxin (0.3150) | 432.52           |
| LLM                 | 21.61  | 375.2192  | 3      | -1.2 | 376.226  | 23.31 | 4.8878E6 | 26815 | 0.7754              | Good       | Non-Toxin (0.3550) | 375.53           |
| IMGL                | 26.14  | 432.2406  | 4      | -3.9 | 433.2462 | 32.32 | 1.1527E7 | 37864 | 0.7727              | Good       | Non-Toxin (0.2400) | 432.58           |
| FDAL                | 24.54  | 464.2271  | 4      | 1.9  | 465.2352 | 25.03 | 1.976E7  | 29575 | 0.7694              | Good       | Non-Toxin (0.2000) | 464.52           |
| IPP                 | 22.92  | 325.2001  | 3      | 1.3  | 326.2078 | 28.33 | 5.1075E8 | 32332 | 0.7668              | Good       | Toxin (0.6900)     | 325.41           |
| PPPT                | 20.22  | 410.2165  | 4      | -2.9 | 411.2226 | 13.62 | 6.9349E6 | 14154 | 0.7639              | Good       | Toxin (0.4200)     | 410.47           |
| TFL                 | 20.82  | 379.2107  | 3      | -0.2 | 380.2179 | 26.43 | 2.4915E7 | 30720 | 0.7581              | Good       | Non-Toxin (0.2250) | 379.46           |
| GLL                 | 22.12  | 301.2001  | 3      | 1.4  | 302.2078 | 23.44 | 5.9458E8 | 27493 | 0.7538              | Good       | Toxin (0.4800)     | 301.39           |
| PAP                 | 20.48  | 283.1532  | 3      | 1.5  | 284.1609 | 11.73 | 8.7056E8 | 17468 | 0.7512              | Good       | Non-Toxin (0.2900) | 283.33           |
| LFK                 | 20.4   | 406.258   | 3      | -0.6 | 204.1362 | 17.66 | 2.2928E6 | 19199 | 0.7501              | Good       | Toxin (0.7300)     | 406.53           |
| VPPP                | 21.96  | 408.2372  | 4      | 1.8  | 409.2452 | 10.96 | 9.6182E6 | 10842 | 0.7465              | Good       | Toxin (0.4050)     | 408.50           |
| LFS                 | 22.35  | 365.1951  | 3      | 0.7  | 366.2026 | 24.57 | 3.3672E7 | 28643 | 0.7445              | Good       | Non-Toxin (0.2600) | 365.43           |
| PLR                 | 23.93  | 384.2485  | 3      | 1.4  | 385.2563 | 7.55  | 5.0966E7 | 7702  | 0.7393              | Good       | Toxin (0.5550)     | 384.48           |
| GIP                 | 23.33  | 285.1688  | 3      | 1.9  | 286.1766 | 8.42  | 9.8949E7 | 9865  | 0.7366              | Good       | Toxin (0.3950)     | 285.34           |
| GAP                 | 21.58  | 243.1219  | 3      | 1.2  | 244.1295 | 11.96 | 2.6632E7 | 12197 | 0.7346              | Good       | Non-Toxin (0.1650) | 243.26           |
| APLL                | 26.28  | 412.2686  | 4      | 2.3  | 413.2768 | 21.52 | 6.1968E8 | 30118 | 0.7343              | Good       | Toxin (0.5550)     | 412.53           |
| LGGLL               | 24.05  | 471.3057  | 5      | 1.3  | 472.3135 | 35.26 | 2.8797E7 | 42023 | 0.7343              | Good       | Toxin (0.5950)     | 471.60           |

|            |       |          |    |      |          |       |          |       |        |      |                    |        |
|------------|-------|----------|----|------|----------|-------|----------|-------|--------|------|--------------------|--------|
| SYPL       | 23.79 | 478.2427 | 4  | -0.9 | 479.2496 | 23.35 | 6.2249E6 | 26905 | 0.7300 | Good | Non-Toxin (0.3700) | 478.55 |
| VLF        | 24.55 | 377.2314 | 3  | 1.6  | 378.2393 | 29.71 | 3.2732E7 | 34403 | 0.7290 | Good | Non-Toxin (0.2550) | 377.48 |
| LPL        | 24.83 | 341.2314 | 3  | 3.6  | 342.24   | 38.38 | 2.0803E9 | 46567 | 0.7285 | Good | Toxin (0.7800)     | 341.45 |
| LLPLL      | 20.63 | 567.3995 | 5  | 2.7  | 568.4083 | 43.59 | 7.3968E6 | 52824 | 0.7224 | Good | Toxin (0.7650)     | 567.77 |
| GPI        | 23.09 | 285.1688 | 3  | 1.9  | 286.1766 | 8.42  | 9.8949E7 | 8094  | 0.7211 | Good | Non-Toxin (0.3750) | 285.34 |
| LFTP       | 22.26 | 476.2635 | 4  | 9    | 477.275  | 25.6  | 3.1511E6 | 29622 | 0.7129 | Good | Non-Toxin (0.1900) | 476.57 |
| LLPP       | 23    | 438.2842 | 4  | 2.1  | 439.2924 | 21.64 | 2.2158E8 | 24876 | 0.7127 | Good | Toxin (0.6650)     | 438.57 |
| IML        | 23.5  | 375.2192 | 3  | -7.8 | 376.2235 | 30.36 | 1.0136E8 | 36788 | 0.7097 | Good | Non-Toxin (0.2050) | 375.53 |
| LGGL       | 29.58 | 358.2216 | 4  | 2.5  | 359.2298 | 21.38 | 4.2268E8 | 25902 | 0.7081 | Good | Non-Toxin (0.3300) | 358.44 |
| FDI        | 27.15 | 393.19   | 3  | 2.1  | 394.1981 | 29.24 | 2.3662E7 | 34336 | 0.7059 | Good | Non-Toxin (0.1650) | 393.44 |
| LSGPL      | 21.5  | 485.2849 | 5  | 4.1  | 486.2942 | 25.54 | 1.956E8  | 31950 | 0.7047 | Good | Toxin (0.4650)     | 485.58 |
| LGG        | 21.22 | 245.1375 | 3  | 1.2  | 246.1451 | 0.21  | 3.1532E8 | 627   | 0.7036 | Good | Non-Toxin (0.3100) | 245.28 |
| LGGGL      | 22.7  | 415.2431 | 5  | 0.3  | 416.2505 | 24.42 | 8.2325E7 | 28094 | 0.7005 | Good | Non-Toxin (0.3500) | 415.49 |
| GGGI       | 22.34 | 302.159  | 4  | 1.5  | 303.1667 | 1.51  | 4.3878E7 | 1011  | 0.6998 | Good | Non-Toxin (0.2750) | 302.33 |
| LPSP       | 21.29 | 509.2849 | 5  | 1.5  | 510.293  | 25.08 | 9.8805E6 | 29307 | 0.6987 | Good | Toxin (0.4950)     | 509.60 |
| KAW        | 23.78 | 403.2219 | 3  | -4.3 | 404.2275 | 22.35 | 1.1233E7 | 25490 | 0.6972 | Good | Toxin (0.7550)     | 403.48 |
| APL        | 24.44 | 299.1845 | 3  | 2.1  | 300.1924 | 10.61 | 4.2381E8 | 10572 | 0.6970 | Good | Toxin (0.4500)     | 299.37 |
| IPG        | 22.89 | 285.1688 | 3  | 1.9  | 286.1766 | 8.42  | 9.8949E7 | 7863  | 0.6961 | Good | Toxin (0.4300)     | 285.34 |
| PPNGLPH    | 27.39 | 731.3602 | 7  | -1   | 366.687  | 12.61 | 0        | 12480 | 0.6961 | Good | Toxin (0.5700)     | 730.82 |
| PALP       | 22.87 | 396.2372 | 4  | 2.5  | 397.2455 | 18.31 | 1.2751E8 | 26414 | 0.6951 | Good | Toxin (0.4500)     | 396.49 |
| VDFG       | 25.61 | 436.1958 | 4  | 3.3  | 437.2045 | 20.18 | 1.0724E7 | 22423 | 0.6927 | Good | Non-Toxin (0.1100) | 436.47 |
| TIPSPPPPPA | 22.76 | 972.528  | 10 | 2.5  | 487.2725 | 22.79 | 2.8517E7 | 26345 | 0.6914 | Poor | Toxin (0.5700)     | 973.14 |
| YLLP       | 22.47 | 504.2948 | 4  | 5.2  | 505.3047 | 32.36 | 1.2803E7 | 38163 | 0.6893 | Good | Toxin (0.3900)     | 504.63 |
| LVW        | 26.69 | 416.2423 | 3  | -0.4 | 417.2495 | 32.1  | 2.1009E7 | 37657 | 0.6791 | Good | Toxin (0.5050)     | 416.52 |
| SLPL       | 22.51 | 428.2635 | 4  | 1.9  | 429.2715 | 22.63 | 3.3169E8 | 27589 | 0.6748 | Good | Toxin (0.7500)     | 428.53 |
| PGA        | 25.5  | 243.1219 | 3  | 0.2  | 244.1292 | 16.3  | 7.0617E7 | 16947 | 0.6743 | Good | Non-Toxin (0.2500) | 243.26 |
| FSI        | 27.02 | 365.1951 | 3  | 3.1  | 366.2035 | 27.4  | 2.1975E8 | 34282 | 0.6677 | Good | Non-Toxin (0.3300) | 365.43 |
| DML        | 24.38 | 377.162  | 3  | -0.3 | 378.1692 | 20.85 | 1.9884E6 | 23696 | 0.6675 | Good | Non-Toxin (0.2450) | 377.46 |
| SPL        | 26.04 | 315.1794 | 3  | 1.6  | 316.1872 | 22.93 | 6.3712E8 | 26343 | 0.6654 | Good | Toxin (0.5450)     | 315.37 |
| LFVP       | 21.93 | 474.2842 | 4  | 4.1  | 475.2934 | 32.01 | 4.218E7  | 38048 | 0.6639 | Good | Non-Toxin (0.2100) | 474.60 |
| FSPV       | 23.38 | 448.2322 | 4  | 0.7  | 449.2398 | 21.61 | 1.0225E9 | 25180 | 0.6624 | Good | Non-Toxin (0.2650) | 448.52 |
| GGI        | 24.25 | 245.1375 | 3  | 1.2  | 246.1451 | 0.21  | 3.1532E8 | 2881  | 0.6607 | Good | Non-Toxin (0.2850) | 245.28 |
| SGLL       | 27.25 | 388.2322 | 4  | -0.2 | 389.2394 | 23.49 | 6.0123E7 | 27158 | 0.6580 | Good | Toxin (0.3850)     | 388.46 |
| GFNIPME    | 21.46 | 822.3582 | 7  | 0.7  | 412.1866 | 30.33 | 1.9128E6 | 35258 | 0.6538 | Good | Non-Toxin (0.2450) | 822.93 |
| GPTP       | 20.96 | 370.1852 | 4  | 1    | 371.1928 | 5.97  | 9.4905E7 | 4431  | 0.6509 | Good | Non-Toxin (0.2600) | 370.41 |
| LRLP       | 21.06 | 497.3326 | 4  | 2.9  | 498.3413 | 21.26 | 4.9477E7 | 24154 | 0.6485 | Good | Toxin (0.5950)     | 497.64 |
| LSPP       | 22.33 | 412.2322 | 4  | 2.5  | 413.2405 | 16.42 | 1.1461E8 | 15621 | 0.6484 | Good | Toxin (0.4800)     | 412.49 |
| DLM        | 22.61 | 377.162  | 3  | 2    | 378.1701 | 8.86  | 1.4275E7 | 8805  | 0.6483 | Good | Non-Toxin (0.2650) | 377.46 |
| KPP        | 21.32 | 340.211  | 3  | 2.6  | 341.2192 | 13.73 | 1.5254E8 | 13018 | 0.6423 | Good | Toxin (0.4850)     | 340.42 |
| DPL        | 21.73 | 343.1743 | 3  | 0.7  | 344.1818 | 17.39 | 1.1766E8 | 19559 | 0.6417 | Good | Toxin (0.3900)     | 343.38 |
| YGAP       | 25.64 | 406.1852 | 4  | 2    | 407.1933 | 10.91 | 3.3137E7 | 10769 | 0.6415 | Good | Non-Toxin (0.2000) | 406.44 |
| LPLR       | 23.57 | 497.3326 | 4  | 2.9  | 498.3413 | 22.73 | 1.1316E8 | 26394 | 0.6410 | Good | Toxin (0.7150)     | 497.64 |
| ILPL       | 22.61 | 454.3155 | 4  | 1.7  | 455.3235 | 31.56 | 1.3562E9 | 37123 | 0.6391 | Good | Toxin (0.8700)     | 454.61 |
| FTPN       | 20.61 | 477.2224 | 4  | 2.2  | 478.2307 | 11.1  | 2.2907E7 | 10431 | 0.6384 | Good | Non-Toxin (0.2350) | 477.52 |
| GPVDPPI    | 27.54 | 903.5065 | 9  | 0.9  | 452.7609 | 38.71 | 6.7104E6 | 46508 | 0.6374 | Good | Toxin (0.3950)     | 904.07 |
| LLGGL      | 21.87 | 471.3057 | 5  | 5.2  | 472.3154 | 32.26 | 1.3701E7 | 37355 | 0.6371 | Good | Toxin (0.5950)     | 471.60 |
| GPVDPDP    | 20.88 | 790.4225 | 8  | -6.4 | 396.216  | 30.75 | 1.181E6  | 35850 | 0.6344 | Good | Non-Toxin (0.3600) | 790.91 |
| ADPL       | 21.71 | 414.2114 | 4  | 1.1  | 415.2192 | 16.71 | 7.6138E7 | 18489 | 0.6328 | Good | Non-Toxin (0.2550) | 414.46 |
| LFV        | 21.57 | 377.2314 | 3  | 2.6  | 378.2397 | 28.6  | 6.6027E7 | 33905 | 0.6328 | Good | Non-Toxin (0.2350) | 377.48 |
| IPAP       | 24.35 | 396.2372 | 4  | 2.5  | 397.2455 | 18.31 | 2.2799E8 | 25941 | 0.6324 | Good | Toxin (0.3900)     | 396.49 |
| PAL        | 24.09 | 299.1845 | 3  | 2.7  | 300.1926 | 27.68 | 2.0823E7 | 31851 | 0.6320 | Good | Non-Toxin (0.2100) | 299.37 |
| PSLP       | 23.71 | 412.2322 | 4  | 4.9  | 413.2415 | 18.82 | 3.5361E7 | 22498 | 0.6308 | Good | Toxin (0.4650)     | 412.49 |
| FALN       | 23.09 | 463.2431 | 4  | 1.6  | 464.2511 | 23.55 | 7.4143E6 | 27172 | 0.6263 | Good | Non-Toxin (0.2450) | 463.53 |
| FSPV       | 24.72 | 448.2322 | 4  | 0.7  | 449.2398 | 21.61 | 1.0225E9 | 25308 | 0.6227 | Good | Non-Toxin (0.2250) | 448.52 |
| PLTPNFK    | 23.44 | 815.4541 | 7  | 2.7  | 408.7354 | 24.13 | 0        | 27839 | 0.6146 | Good | Toxin (0.4750)     | 815.97 |
| FDAI       | 24.54 | 464.2271 | 4  | 1.9  | 465.2352 | 25.03 | 1.976E7  | 29575 | 0.6079 | Good | Non-Toxin (0.2200) | 464.52 |
| PPK        | 20.71 | 340.211  | 3  | 0.9  | 341.2186 | 8.87  | 3.3226E7 | 6089  | 0.6062 | Good | Toxin (0.5000)     | 340.42 |
| SPDNPIR    | 32.81 | 898.4508 | 8  | -0.7 | 450.2324 | 20.1  | 1.0125E7 | 22476 | 0.6052 | Good | Non-Toxin (0.2700) | 898.97 |
| LIGP       | 25.63 | 398.2529 | 4  | 2.8  | 399.2613 | 14.51 | 3.5075E8 | 17441 | 0.6035 | Good | Toxin (0.5000)     | 398.50 |
| ILP        | 24.15 | 341.2314 | 3  | 1.3  | 342.2392 | 21.64 | 3.2333E9 | 25457 | 0.5973 | Good | Toxin (0.7550)     | 341.45 |
| ITLF       | 20.73 | 492.2948 | 4  | 5.3  | 493.3047 | 36.04 | 3.9334E6 | 43380 | 0.5944 | Good | Non-Toxin (0.1000) | 492.62 |
| AGL        | 26.91 | 259.1532 | 3  | 0.8  | 260.1607 | 7.81  | 7.8576E7 | 6880  | 0.5929 | Good | Non-Toxin (0.2550) | 259.31 |
| YILP       | 22.47 | 504.2948 | 4  | 5.2  | 505.3047 | 32.36 | 1.2803E7 | 38163 | 0.5928 | Good | Toxin (0.4750)     | 504.63 |
| LAGLL      | 21.69 | 485.3213 | 5  | -2   | 486.3276 | 34.08 | 1.0522E6 | 40269 | 0.5892 | Good | Toxin (0.4850)     | 485.62 |
| IYLP       | 20.34 | 504.2948 | 4  | 3.4  | 505.3037 | 30.34 | 6.4088E6 | 35205 | 0.5865 | Good | Non-Toxin (0.3100) | 504.63 |
| LPDL       | 23.02 | 456.2584 | 4  | 2.2  | 457.2666 | 21.82 | 1.4223E7 | 24636 | 0.5859 | Good | Toxin (0.4450)     | 456.54 |
| PLH        | 22.79 | 365.2063 | 3  | 4    | 366.215  | 15.98 | 9.6465E6 | 16762 | 0.5846 | Good | Toxin (0.4500)     | 365.43 |
| FINPV      | 22.96 | 588.3271 | 5  | 2.8  | 589.3361 | 29.4  | 2.3008E7 | 34075 | 0.5808 | Good | Non-Toxin (0.3250) | 588.70 |
| TAF        | 23.1  | 337.1638 | 3  | 1.7  | 338.1716 | 12.52 | 3.1576E6 | 11742 | 0.5806 | Good | Non-Toxin (0.2100) | 337.38 |
| LGAP       | 24.47 | 356.2059 | 4  | 2    | 357.2139 | 11.87 | 5.669E8  | 14680 | 0.5797 | Good | Non-Toxin (0.2200) | 356.42 |
| SPVVKMC    | 20.28 | 762.3768 | 7  | 6.9  | 382.1983 | 26.31 | 0        | 30601 | 0.5766 | Good | Toxin (0.6900)     | 762.99 |
| GTPPKPGR   | 30.67 | 824.4868 | 8  | 1.7  | 275.8367 | 9.75  | 4.2964E6 | 8624  | 0.5764 | Good | Toxin (0.4450)     | 824.98 |
| FLE        | 20.34 | 407.2056 | 3  | 2.6  | 408.214  | 17.76 | 4.6437E6 | 19501 | 0.5760 | Good | Toxin (0.4000)     | 407.47 |
| YAP        | 26.52 | 349.1638 | 3  | 0.8  | 350.1713 | 8.8   | 9.6964E6 | 8758  | 0.5753 | Good | Non-Toxin (0.1350) | 349.39 |
| SLP        | 25.63 | 315.1794 | 3  | 0.9  | 316.187  | 13.97 | 7.0631E8 | 14428 | 0.5681 | Good | Toxin (0.5300)     | 315.37 |
| GVM        | 21.6  | 305.1409 | 3  | 0.5  | 306.1483 | 8.39  | 2.1097E6 | 7375  | 0.5628 | Good | Non-Toxin (0.1600) | 305.40 |
| ITFG       | 23.66 | 436.2322 | 4  | -8.2 | 437.2359 | 27.25 | 3.9371E7 | 31609 | 0.5622 | Good | Non-Toxin (0.0950) | 436.51 |
| APAPAPVAVP | 33.08 | 888.5068 | 10 | 1.3  | 445.2613 | 24.73 | 2.571E7  | 28425 | 0.5600 | Poor | Non-Toxin (0.1950) | 889.06 |
| LVDGF      | 23.27 | 549.2798 | 5  | 2.6  | 550.2886 | 29.43 | 5.1979E7 | 33979 | 0.5560 | Good | Non-Toxin (0.1550) | 549.62 |
| DLP        | 25.97 | 343.1743 | 3  | 0.7  | 344.1818 | 17.39 | 1.0725E8 | 18063 | 0.5497 | Good | Toxin (0.4200)     | 343.38 |
| IPSP       | 22.22 | 412.2322 | 4  | 2.5  | 413.2405 | 16.42 | 1.1461E8 | 18861 | 0.5495 | Good | Toxin (0.4500)     | 412.49 |
| SPLTP      | 21.36 | 513.2798 | 5  | 2.2  | 514.2883 | 16.63 | 9.8588E7 | 21463 | 0.5462 | Good | Non-Toxin (0.3400) | 513.59 |
| KPG        | 22.31 | 300.1797 | 3  | 1.9  | 301.1876 | 12.2  | 4.8176E6 | 11883 | 0.5437 | Good | Non-Toxin (0.3400) | 300.36 |
| LPPV       | 20.05 | 424.2686 | 4  | 0.6  | 425.2761 | 22.35 | 1.0935E8 | 25608 | 0.5422 | Good | Toxin (0.5350)     | 424.54 |
| RAP        | 22.75 | 342.2015 | 3  | 1.8  | 343.2094 | 8.95  | 1.63E6   | 7752  | 0.5348 | Good | Non-Toxin (0.2450) | 342.40 |
| GGSL       | 22.47 | 445.2536 | 5  | 2.2  | 446.2619 | 21.89 | 1.4873E6 | 24949 | 0.5327 | Good | Toxin (0.3950)     | 445.52 |
| PLKP       | 20.54 | 453.2951 | 4  | 1.2  | 454.3029 | 13.72 | 7.4733E7 | 14527 | 0.5316 | Good | Toxin (0.6200)     | 453.58 |

|                |       |           |    |      |          |       |          |       |        |          |                    |         |
|----------------|-------|-----------|----|------|----------|-------|----------|-------|--------|----------|--------------------|---------|
| IFV            | 21.57 | 377.2314  | 3  | 2.6  | 378.2397 | 28.6  | 6.6027E7 | 33905 | 0.5301 | Good     | Non-Toxin (0.2750) | 377.48  |
| APSL           | 24.57 | 386.2165  | 4  | 1    | 387.2242 | 14.6  | 1.6232E8 | 18384 | 0.5287 | Good     | Non-Toxin (0.1550) | 386.45  |
| LPVP           | 22.22 | 424.2686  | 4  | 2.8  | 425.277  | 23.06 | 5.7499E8 | 30385 | 0.5258 | Good     | Toxin (0.5200)     | 424.54  |
| DPVNPKP        | 21.7  | 765.4021  | 7  | 0.5  | 383.7085 | 18.66 | 0        | 20542 | 0.5216 | Good     | Non-Toxin (0.2150) | 765.86  |
| PGK            | 24.89 | 300.1797  | 3  | 2.1  | 301.1877 | 6.62  | 1.0723E8 | 5311  | 0.5179 | Good     | Toxin (0.4050)     | 300.36  |
| LPLA           | 20.45 | 412.2686  | 4  | 2.3  | 413.2768 | 21.52 | 4.2102E8 | 26591 | 0.5171 | Good     | Toxin (0.6750)     | 412.53  |
| PLA            | 20.99 | 299.1845  | 3  | -0.4 | 300.1916 | 20.34 | 8.8141E7 | 22428 | 0.5148 | Good     | Toxin (0.4100)     | 299.37  |
| LGSP           | 24.1  | 372.2009  | 4  | 1.7  | 373.2088 | 12.85 | 1.912E7  | 13084 | 0.5147 | Good     | Non-Toxin (0.2950) | 372.42  |
| GSNPGRPV       | 23.02 | 782.4034  | 8  | 1.3  | 392.2095 | 9.9   | 1.496E7  | 8763  | 0.5132 | Good     | Non-Toxin (0.3600) | 782.85  |
| FST            | 22.78 | 353.1587  | 3  | 2    | 354.1667 | 21.15 | 4.0132E5 | 23869 | 0.5107 | Good     | Non-Toxin (0.1350) | 353.38  |
| FTA            | 21.45 | 337.1638  | 3  | 1.7  | 338.1716 | 12.52 | 3.1576E6 | 12409 | 0.5085 | Good     | Non-Toxin (0.1600) | 337.38  |
| PLN            | 23.59 | 342.1903  | 3  | 1    | 343.1979 | 0.19  | 1.3379E8 | 2019  | 0.5074 | Good     | Toxin (0.5050)     | 342.40  |
| PSAP           | 20.36 | 370.1852  | 4  | 4    | 371.194  | 15.59 | 2.6211E5 | 16507 | 0.5058 | Good     | Non-Toxin (0.1750) | 370.41  |
| LVDGFNPME      | 21.31 | 1149.5376 | 10 | 3.9  | 575.7783 | 37.94 | 6.0726E7 | 46112 | 0.5037 | Good     | Non-Toxin (0.1850) | 1134.32 |
| LLLLLLASRLSS   | 34.69 | 1637.0854 | 15 | 4.7  | 819.5538 | 42.16 | 3.1074E6 | 51042 | 0.5035 | Poor     | Toxin (0.4950)     | 1638.11 |
| VLP            | 20.85 | 424.2686  | 4  | 1.6  | 425.2765 | 18.87 | 1.9639E8 | 19700 | 0.5030 | Good     | Toxin (0.4600)     | 424.54  |
| APLA           | 21.02 | 370.2216  | 4  | 3.3  | 371.2301 | 10.84 | 6.558E6  | 10251 | 0.5025 | Good     | Non-Toxin (0.3100) | 370.45  |
| PTLP           | 22.32 | 426.2478  | 4  | 1.5  | 427.2557 | 14.2  | 2.2256E8 | 18146 | 0.5021 | Good     | Non-Toxin (0.2150) | 426.51  |
| LLY            | 22.65 | 407.242   | 3  | 1    | 408.2497 | 22.8  | 1.4609E7 | 26237 | 0.5016 | Good     | Toxin (0.4000)     | 407.51  |
| KLLPL          | 20.43 | 582.4105  | 5  | 1.8  | 583.4188 | 29.87 | 9.3755E7 | 36128 | 0.5010 | Good     | Toxin (0.8550)     | 582.78  |
| GSL            | 24.28 | 275.1481  | 3  | 2.4  | 276.156  | 0.28  | 5.787E7  | 1932  | 0.4991 | Good     | Non-Toxin (0.3150) | 275.30  |
| KPL            | 26.9  | 356.2423  | 3  | 1    | 357.25   | 20.77 | 3.1587E8 | 26724 | 0.4946 | Good     | Toxin (0.6000)     | 356.47  |
| LLLLLLCRKRNQAK | 30.52 | 2711.6724 | 23 | 6    | 678.9294 | 52.63 | 3.199E5  | 64203 | 0.4892 | Good     | Toxin (0.4900)     | 2712.43 |
| OPPKP          | 24.89 | 372.2372  | 4  | 0.9  | 373.2448 | 23.4  | 3.9028E7 | 26998 | 0.4848 | Good     | Non-Toxin (0.3300) | 372.46  |
| AVAF           | 22.25 | 406.2216  | 4  | -3.6 | 407.2274 | 19.07 | 2.6265E6 | 21059 | 0.4814 | Good     | Non-Toxin (0.3000) | 406.48  |
| GTLP           | 23.89 | 386.2165  | 4  | 1    | 387.2242 | 14.6  | 1.6232E8 | 15150 | 0.4800 | Good     | Non-Toxin (0.3000) | 386.45  |
| GVSPDNPIR      | 24.86 | 1054.5406 | 10 | 3.2  | 528.2793 | 20.1  | 3.1601E8 | 22817 | 0.4781 | Good     | Non-Toxin (0.2550) | 1055.16 |
| PDNPIR         | 20.41 | 811.4188  | 7  | 2.5  | 406.7177 | 20.15 | 0        | 22501 | 0.4775 | Good     | Non-Toxin (0.2600) | 811.89  |
| AEFAL          | 20.04 | 549.2798  | 5  | 2.4  | 550.2885 | 32.77 | 2.9123E6 | 38862 | 0.4774 | Good     | Non-Toxin (0.1600) | 549.62  |
| KLGP           | 21.94 | 413.2638  | 4  | 2    | 414.2719 | 12.2  | 1.8599E7 | 11792 | 0.4768 | Good     | Toxin (0.6150)     | 413.52  |
| ISLVDGF        | 25.94 | 749.3959  | 7  | 4.5  | 750.4066 | 40.65 | 3.0639E6 | 49104 | 0.4753 | Good     | Non-Toxin (0.1650) | 749.86  |
| VPLL           | 23.68 | 440.2999  | 4  | 0.9  | 441.3076 | 25.89 | 3.9486E7 | 30068 | 0.4750 | Good     | Toxin (0.4650)     | 440.58  |
| GVSPDNPIRTR    | 26.85 | 1155.5884 | 11 | 1.9  | 578.8026 | 21.37 | 0        | 24228 | 0.4745 | Good     | Non-Toxin (0.2300) | 1156.26 |
| DGSNPGRPV      | 27.05 | 897.4304  | 9  | 0.9  | 449.7229 | 11.97 | 8.9383E6 | 11565 | 0.4728 | Good     | Non-Toxin (0.2700) | 897.94  |
| PLVP           | 20.94 | 424.2686  | 4  | 2.8  | 425.277  | 23.06 | 2.4397E8 | 27936 | 0.4713 | Good     | Toxin (0.4700)     | 424.54  |
| SALP           | 20.15 | 386.2165  | 4  | 1    | 387.2242 | 14.6  | 1.6232E8 | 14980 | 0.4702 | Good     | Toxin (0.4350)     | 386.45  |
| IPVP           | 22.22 | 424.2686  | 4  | 2.8  | 425.277  | 23.06 | 5.7499E8 | 30385 | 0.4652 | Good     | Non-Toxin (0.2750) | 424.54  |
| LTPP           | 24.5  | 426.2478  | 4  | 1.5  | 427.2557 | 14.2  | 2.2256E8 | 18932 | 0.4623 | Good     | Non-Toxin (0.3100) | 426.51  |
| PIR            | 21.15 | 497.3326  | 4  | 1.1  | 249.6738 | 21.98 | 3.5982E7 | 26319 | 0.4590 | Good     | Toxin (0.4050)     | 497.64  |
| PSSP           | 23.83 | 386.1801  | 4  | 3.4  | 387.1887 | 16.78 | 3.4351E6 | 18239 | 0.4544 | Good     | Non-Toxin (0.2750) | 386.40  |
| TGGL           | 28.04 | 346.1852  | 4  | -2.5 | 347.1917 | 7.87  | 8.1352E6 | 6591  | 0.4524 | Good     | Non-Toxin (0.2500) | 346.38  |
| MTL            | 20.21 | 363.1828  | 3  | -8.7 | 364.1869 | 18.66 | 5.2477E7 | 23098 | 0.4470 | Good     | Non-Toxin (0.1200) | 363.48  |
| AYSLTAPPPP     | 30.27 | 1012.5229 | 10 | 0.8  | 507.2691 | 16.26 | 0        | 17428 | 0.4403 | Poor     | Non-Toxin (0.2400) | 1013.16 |
| LGI            | 26.04 | 301.2001  | 3  | 2.9  | 302.2083 | 22.57 | 1.1277E9 | 26580 | 0.4377 | Good     | Non-Toxin (0.3450) | 301.39  |
| ADPI           | 21.71 | 414.2114  | 4  | 1.1  | 415.2192 | 16.71 | 7.6138E7 | 18489 | 0.4362 | Good     | Non-Toxin (0.2250) | 414.46  |
| IAGL           | 24.89 | 372.2372  | 4  | 0.9  | 373.2448 | 23.4  | 3.9028E7 | 26998 | 0.4342 | Good     | Non-Toxin (0.2400) | 372.46  |
| IAP            | 26.87 | 299.1845  | 3  | 2    | 300.1924 | 25.26 | 9.9646E8 | 29438 | 0.4335 | Good     | Non-Toxin (0.2450) | 299.37  |
| IFML           | 21.77 | 476.2668  | 4  | -6.9 | 477.2708 | 33.22 | 3.548E7  | 39184 | 0.4332 | Good     | Non-Toxin (0.1000) | 476.64  |
| TLM            | 20.91 | 363.1828  | 3  | 1.1  | 364.1905 | 14.56 | 2.731E6  | 15347 | 0.4281 | Good     | Non-Toxin (0.1650) | 363.48  |
| LAG            | 23.18 | 259.1532  | 3  | 0.8  | 260.1607 | 7.81  | 2.5088E7 | 5725  | 0.4257 | Good     | Non-Toxin (0.2550) | 259.31  |
| ILTPL          | 23.14 | 555.3632  | 5  | 3.2  | 556.3722 | 32.06 | 2.8804E7 | 37577 | 0.4234 | Good     | Toxin (0.3850)     | 555.72  |
| LPD            | 26.61 | 343.1743  | 3  | 0.6  | 344.1818 | 18.53 | 9.7849E7 | 20473 | 0.4229 | Good     | Toxin (0.4850)     | 343.38  |
| KLLP           | 24.01 | 469.3264  | 4  | 2.5  | 470.3348 | 21.2  | 2.438E8  | 25062 | 0.4222 | Good     | Toxin (0.8000)     | 469.63  |
| FTPVDPK        | 24.43 | 802.4225  | 7  | 1.2  | 402.219  | 18.41 | 1.6294E7 | 20328 | 0.4183 | Good     | Non-Toxin (0.2450) | 802.93  |
| LSGLI          | 20.5  | 501.3162  | 5  | 3.1  | 502.325  | 30.01 | 8.3299E6 | 35091 | 0.4147 | Good     | Toxin (0.4000)     | 501.62  |
| ALAP           | 20.21 | 370.2216  | 4  | 1.9  | 371.2296 | 25.79 | 7.9504E6 | 29853 | 0.4090 | Good     | Non-Toxin (0.1450) | 370.45  |
| ILR            | 23.29 | 400.2798  | 3  | 1.3  | 401.2876 | 22.73 | 5.893E6  | 25964 | 0.4082 | Good     | Toxin (0.4600)     | 400.52  |
| LTP            | 23.75 | 442.2791  | 4  | 2.7  | 443.2876 | 26.4  | 6.1114E8 | 31305 | 0.4062 | Good     | Non-Toxin (0.3300) | 442.56  |
| LPK            | 26.85 | 356.2423  | 3  | 1    | 357.25   | 20.77 | 3.7032E8 | 24959 | 0.4043 | Good     | Toxin (0.6200)     | 356.47  |
| AAALLI         | 22.22 | 570.3741  | 6  | 3.4  | 571.3833 | 35.82 | 5.7761E7 | 42946 | 0.4022 | Good     | Toxin (0.4100)     | 570.73  |
| VLM            | 20.49 | 361.2035  | 3  | 1.1  | 362.2112 | 17.75 | 4.6313E6 | 19277 | 0.4012 | Good     | Non-Toxin (0.1650) | 361.51  |
| TFK            | 21.23 | 394.2216  | 3  | 0.7  | 395.2292 | 20.1  | 2.3954E7 | 22603 | 0.3991 | Good     | Toxin (0.4350)     | 394.47  |
| TP             | 26.24 | 329.1951  | 3  | 5.6  | 330.2042 | 19.26 | 8.0015E8 | 21838 | 0.3986 | Good     | Non-Toxin (0.3700) | 329.40  |
| LPSI           | 24.47 | 428.2635  | 4  | 1.5  | 429.2714 | 27.22 | 8.9608E8 | 33298 | 0.3957 | Good     | Toxin (0.5050)     | 428.53  |
| IVGLL          | 20.56 | 513.3526  | 5  | 3.8  | 514.3618 | 34.55 | 1.555E7  | 41512 | 0.3930 | Good     | Toxin (0.5150)     | 513.68  |
| LILLLLFSLLEA   | 23.68 | 1356.8632 | 12 | -7.5 | 679.4338 | 53.15 | 0        | 64847 | 0.3927 | Moderate | Toxin (0.3800)     | 1357.74 |
| LGVP           | 24.71 | 384.2372  | 4  | 0.3  | 385.2446 | 18.55 | 5.7193E7 | 20457 | 0.3925 | Good     | Non-Toxin (0.2350) | 384.48  |
| LTPG           | 23.43 | 386.2165  | 4  | 1.6  | 387.2244 | 12.31 | 5.658E7  | 12121 | 0.3910 | Good     | Non-Toxin (0.2200) | 386.45  |
| PIPDHVP        | 23.94 | 844.4443  | 8  | -9.9 | 423.2253 | 17.91 | 0        | 19531 | 0.3895 | Good     | Non-Toxin (0.2600) | 844.97  |
| RTPL           | 22.32 | 485.2962  | 4  | 3.1  | 486.3049 | 9.78  | 3.2467E7 | 8681  | 0.3835 | Good     | Non-Toxin (0.2700) | 485.58  |
| GLK            | 26.07 | 316.211   | 3  | -1.4 | 317.2179 | 13.16 | 5.2852E6 | 13381 | 0.3791 | Good     | Toxin (0.7250)     | 316.40  |
| TLPG           | 20.46 | 386.2165  | 4  | 2.1  | 387.2246 | 10.11 | 9.989E7  | 10388 | 0.3790 | Good     | Toxin (0.3800)     | 386.45  |
| PVNPVPPVILPPV  | 24.07 | 1227.7227 | 12 | -1.8 | 410.2474 | 19.66 | 1.8406E6 | 21663 | 0.3746 | Poor     | Non-Toxin (0.2350) | 1228.50 |
| IAGLI          | 21.69 | 485.3213  | 5  | -2   | 486.3276 | 34.08 | 1.0522E6 | 40269 | 0.3685 | Good     | Non-Toxin (0.3450) | 485.62  |
| LPTSP          | 21.96 | 513.2798  | 5  | 2.2  | 514.2883 | 16.63 | 9.8588E7 | 17733 | 0.3643 | Good     | Non-Toxin (0.2200) | 513.59  |
| LAL            | 23.31 | 315.2158  | 3  | 0.8  | 316.2233 | 24.26 | 6.342E8  | 29270 | 0.3637 | Good     | Non-Toxin (0.2300) | 315.41  |
| PSI            | 22.66 | 315.1794  | 3  | 0.9  | 316.187  | 13.97 | 1.9292E8 | 15995 | 0.3618 | Good     | Non-Toxin (0.3450) | 315.37  |
| LNIP           | 21.55 | 455.2744  | 4  | 1.7  | 456.2824 | 23.63 | 6.6002E8 | 31755 | 0.3563 | Good     | Non-Toxin (0.2950) | 455.55  |
| IGVP           | 24.71 | 384.2372  | 4  | 0.3  | 385.2446 | 18.55 | 5.7193E7 | 20457 | 0.3545 | Good     | Non-Toxin (0.1750) | 384.48  |
| KRL            | 21.72 | 415.2907  | 3  | -4.5 | 416.2961 | 33.95 | 9.643E4  | 40144 | 0.3542 | Good     | Toxin (0.5550)     | 415.54  |
| GVSPDNPI       | 31.6  | 898.4396  | 9  | 0.5  | 899.4473 | 23.29 | 6.9734E8 | 26893 | 0.3538 | Good     | Non-Toxin (0.1800) | 898.97  |
| PTL            | 22.34 | 329.1951  | 3  | 2.2  | 330.2031 | 31.15 | 8.4025E6 | 36460 | 0.3524 | Good     | Non-Toxin (0.1400) | 329.40  |
| YSL            | 21.41 | 381.19    | 3  | 1.6  | 382.1978 | 33.41 | 4.1467E6 | 39913 | 0.3513 | Good     | Non-Toxin (0.2200) | 381.43  |
| DSL            | 21.84 | 446.2376  | 4  | 2.7  | 447.2461 | 24.05 | 6.4235E6 | 27823 | 0.3512 | Good     | Toxin (0.3900)     | 446.50  |
| QSL            | 21.37 | 459.2693  | 4  | 2.6  | 460.2778 | 23.39 | 9.2153E6 | 27023 | 0.3493 | Good     | Toxin (0.3850)     | 459.54  |
| LQIP           | 21.11 | 469.29    | 4  | 5.2  | 470.2997 | 26.7  | 2.816E8  | 34026 | 0.3493 | Good     | Non-Toxin (0.3450) | 469.58  |
| THHPP          | 20.82 | 700.3657  | 6  | -1.2 | 351.1897 | 9.67  | 0        | 8603  | 0.3475 | Good     | Toxin (0.4700)     | 700.80  |

|                  |       |           |    |      |          |       |          |       |        |          |                    |         |
|------------------|-------|-----------|----|------|----------|-------|----------|-------|--------|----------|--------------------|---------|
| AALLI            | 25.11 | 499.337   | 5  | 2.3  | 500.3454 | 34.78 | 3.2452E7 | 41396 | 0.3461 | Good     | Toxin (0.4200)     | 499.65  |
| LRI              | 20.31 | 400.2798  | 3  | 2.3  | 401.288  | 16.48 | 4.1691E6 | 17742 | 0.3397 | Good     | Toxin (0.4600)     | 400.52  |
| TVW              | 26    | 404.206   | 3  | 2.8  | 405.2144 | 22.24 | 5.0374E6 | 25352 | 0.3388 | Good     | Non-Toxin (0.3550) | 404.47  |
| FVDI             | 24.7  | 492.2584  | 4  | 2.7  | 493.267  | 29.73 | 3.1696E7 | 34903 | 0.3365 | Good     | Non-Toxin (0.1200) | 492.57  |
| KLL              | 21.55 | 372.2736  | 3  | 2.1  | 373.2817 | 11.49 | 1.19E8   | 11084 | 0.3360 | Good     | Toxin (0.8950)     | 372.51  |
| SLPS             | 21.69 | 402.2114  | 4  | 1.6  | 403.2194 | 5.56  | 1.6842E8 | 6730  | 0.3343 | Good     | Toxin (0.4500)     | 402.45  |
| APS              | 23.38 | 273.1324  | 3  | 0.5  | 274.1399 | 6.71  | 9.1386E7 | 5392  | 0.3337 | Good     | Non-Toxin (0.1350) | 273.29  |
| VPR              | 22.4  | 370.2328  | 3  | 3.6  | 371.2415 | 11.01 | 2.3426E7 | 10474 | 0.3313 | Good     | Non-Toxin (0.2450) | 370.45  |
| SIL              | 22.38 | 331.2107  | 3  | 3.2  | 332.219  | 21.45 | 3.3627E8 | 24582 | 0.3309 | Good     | Toxin (0.4900)     | 331.41  |
| AGIA             | 25.11 | 330.1903  | 4  | 1.3  | 331.198  | 6.7   | 8.0603E7 | 5682  | 0.3293 | Good     | Non-Toxin (0.2400) | 330.38  |
| IGTL             | 25.04 | 402.2478  | 4  | 0.7  | 403.2554 | 19.39 | 3.7141E8 | 21362 | 0.3291 | Good     | Non-Toxin (0.2250) | 402.49  |
| LASP             | 23.35 | 386.2165  | 4  | 2.1  | 387.2246 | 10.11 | 3.1879E8 | 11446 | 0.3264 | Good     | Non-Toxin (0.2450) | 386.45  |
| SLPT             | 24.88 | 416.2271  | 4  | 1.8  | 417.2351 | 8.26  | 9.2488E7 | 8257  | 0.3185 | Good     | Non-Toxin (0.2450) | 416.47  |
| TLGAP            | 21.21 | 457.2536  | 5  | 3.8  | 458.2627 | 13.9  | 4.2055E7 | 14477 | 0.3173 | Good     | Non-Toxin (0.2350) | 457.53  |
| SSIL             | 25.62 | 418.2427  | 4  | 0.8  | 419.2503 | 23.13 | 1.8726E6 | 26637 | 0.3171 | Good     | Toxin (0.3800)     | 418.49  |
| LSSP             | 24.84 | 402.2114  | 4  | 1.6  | 403.2194 | 5.56  | 1.7696E8 | 5500  | 0.3171 | Good     | Non-Toxin (0.3250) | 402.45  |
| LLTP             | 25.23 | 442.2791  | 4  | 2.6  | 443.2875 | 20.5  | 3.8913E8 | 22970 | 0.3170 | Good     | Non-Toxin (0.2450) | 442.56  |
| TVF              | 25.92 | 365.1951  | 3  | 1.8  | 366.203  | 19.59 | 1.3545E7 | 21966 | 0.3166 | Good     | Non-Toxin (0.1800) | 365.43  |
| LVLL             | 22.16 | 569.4152  | 5  | 4.3  | 570.4249 | 44.29 | 1.0421E6 | 53717 | 0.3159 | Good     | Toxin (0.4650)     | 569.79  |
| IVGP             | 23.04 | 384.2372  | 4  | 1.2  | 385.245  | 12.05 | 1.7082E8 | 11894 | 0.3147 | Good     | Toxin (0.4250)     | 384.48  |
| LIDL             | 27.39 | 472.2897  | 4  | 3.7  | 473.2987 | 30.86 | 2.5905E8 | 36835 | 0.3138 | Good     | Non-Toxin (0.3250) | 472.58  |
| IVPVDPP          | 21.63 | 735.4166  | 7  | 3.3  | 368.7168 | 28.07 | 1.4662E6 | 32136 | 0.3114 | Good     | Non-Toxin (0.2150) | 735.88  |
| TGL              | 26.44 | 289.1638  | 3  | 0.6  | 290.1712 | 8.42  | 9.7736E7 | 8453  | 0.3107 | Good     | Non-Toxin (0.2750) | 289.33  |
| IYDPHQPT         | 24.49 | 969.4556  | 8  | 1.5  | 485.7358 | 16.35 | 8.6797E6 | 17535 | 0.3086 | Good     | Non-Toxin (0.1400) | 970.05  |
| VGGI             | 25.17 | 344.206   | 4  | 2.6  | 345.2141 | 13.91 | 6.6145E8 | 17107 | 0.3017 | Good     | Toxin (0.5000)     | 344.41  |
| YVP              | 24.3  | 377.1951  | 3  | 1.9  | 378.2031 | 15.59 | 2.934E7  | 16873 | 0.3010 | Good     | Non-Toxin (0.1500) | 377.44  |
| DIPVDQPAK        | 23.28 | 981.5131  | 9  | 0.4  | 491.764  | 18.84 | 2.1796E6 | 20709 | 0.3008 | Good     | Non-Toxin (0.2050) | 982.10  |
| LTP              | 26.66 | 329.1951  | 3  | 0.7  | 330.2026 | 22.99 | 9.9902E8 | 27316 | 0.2996 | Good     | Non-Toxin (0.1800) | 329.40  |
| LSAL             | 26.9  | 402.2478  | 4  | 2.2  | 403.256  | 18.08 | 3.762E8  | 24220 | 0.2993 | Good     | Non-Toxin (0.2550) | 402.49  |
| LGK              | 25.98 | 316.211   | 3  | -0.7 | 317.2181 | 11.62 | 1.0044E7 | 10758 | 0.2984 | Good     | Toxin (0.5050)     | 316.40  |
| YTP              | 24.4  | 492.2584  | 4  | 2.6  | 493.267  | 21.66 | 2.7631E7 | 24630 | 0.2980 | Good     | Non-Toxin (0.2000) | 492.57  |
| VPTP             | 20.98 | 412.2322  | 4  | 2.5  | 413.2405 | 16.42 | 1.1461E8 | 16425 | 0.2968 | Good     | Non-Toxin (0.1350) | 412.49  |
| RTLTP            | 20.33 | 485.2962  | 4  | 3.1  | 486.3049 | 9.78  | 3.2467E7 | 8837  | 0.2965 | Good     | Non-Toxin (0.2650) | 485.58  |
| ILTP             | 25.23 | 442.2791  | 4  | 2.6  | 443.2875 | 20.5  | 3.8913E8 | 22970 | 0.2959 | Good     | Non-Toxin (0.2700) | 442.56  |
| LITP             | 24.75 | 442.2791  | 4  | 2    | 443.2873 | 29.75 | 2.345E8  | 34771 | 0.2956 | Good     | Non-Toxin (0.3400) | 442.56  |
| STDGNSPGRPV      | 28.98 | 1085.5101 | 11 | 1.7  | 543.7632 | 12.2  | 3.1672E7 | 11777 | 0.2956 | Good     | Non-Toxin (0.2050) | 1086.13 |
| GIPPDQ           | 27.84 | 753.3657  | 7  | 2.7  | 754.375  | 14.85 | 2.4067E7 | 16015 | 0.2956 | Good     | Non-Toxin (0.3700) | 753.81  |
| YFIGVS           | 24.18 | 684.3483  | 6  | 5.6  | 685.3594 | 32.73 | 1.7667E7 | 38632 | 0.2949 | Good     | Non-Toxin (0.1850) | 684.79  |
| IPVDQPAK         | 22.78 | 866.4861  | 8  | 0.8  | 434.2507 | 14.9  | 0        | 15612 | 0.2942 | Good     | Non-Toxin (0.2600) | 867.01  |
| IPT              | 23.94 | 329.1951  | 3  | 1.8  | 330.2029 | 11.68 | 5.999E8  | 11622 | 0.2942 | Good     | Non-Toxin (0.1850) | 329.40  |
| SLTAP            | 22.84 | 487.2642  | 5  | 3.1  | 488.273  | 17.59 | 8.1899E6 | 19134 | 0.2928 | Good     | Non-Toxin (0.1850) | 487.55  |
| LSAAL            | 24.19 | 473.2849  | 5  | -6.2 | 474.2892 | 37.63 | 5.0884E5 | 45350 | 0.2926 | Good     | Non-Toxin (0.2350) | 473.57  |
| TIPSP            | 21.93 | 513.2798  | 5  | 2.1  | 514.2882 | 14.08 | 1.913E7  | 15559 | 0.2924 | Good     | Non-Toxin (0.2950) | 513.59  |
| DAIL             | 23.36 | 430.2427  | 4  | -1.5 | 431.2494 | 26.49 | 1.0652E8 | 30498 | 0.2916 | Good     | Non-Toxin (0.3050) | 430.50  |
| SVM              | 23.38 | 335.1515  | 3  | 2.3  | 336.1595 | 8.27  | 6.3633E6 | 7304  | 0.2883 | Good     | Non-Toxin (0.1500) | 335.42  |
| IGEP             | 20.97 | 414.2114  | 4  | 3.2  | 415.22   | 13.22 | 2.0419E7 | 13311 | 0.2828 | Good     | Non-Toxin (0.2800) | 414.46  |
| TDGNSPGRPV       | 32.03 | 998.4781  | 10 | 0.6  | 500.2466 | 11.88 | 1.7004E7 | 11438 | 0.2805 | Good     | Non-Toxin (0.2250) | 999.05  |
| LGID             | 22.83 | 416.2271  | 4  | 1.3  | 417.2349 | 19.3  | 1.0831E8 | 21590 | 0.2801 | Good     | Non-Toxin (0.2300) | 416.47  |
| QAL              | 20.76 | 330.1903  | 3  | -1   | 331.1973 | 7.96  | 6.3909E7 | 8694  | 0.2796 | Good     | Non-Toxin (0.1850) | 330.38  |
| VLPA             | 22.11 | 398.2529  | 4  | 2.8  | 399.2613 | 14.51 | 4.6944E8 | 16382 | 0.2753 | Good     | Non-Toxin (0.3650) | 398.50  |
| AISL             | 22.3  | 402.2478  | 4  | 0.6  | 403.2553 | 16.68 | 8.3864E7 | 17952 | 0.2743 | Good     | Non-Toxin (0.3450) | 402.49  |
| LGAN             | 20.61 | 373.1961  | 4  | -4.9 | 374.2015 | 34.47 | 1.9818E6 | 40314 | 0.2738 | Good     | Non-Toxin (0.2400) | 373.41  |
| ISSP             | 24.84 | 402.2114  | 4  | 1.6  | 403.2194 | 5.56  | 1.7696E8 | 5500  | 0.2737 | Good     | Non-Toxin (0.2650) | 402.45  |
| IYDPHQPTLE       | 25.47 | 1211.5823 | 10 | 1.1  | 606.7991 | 23.86 | 5.57E6   | 27465 | 0.2708 | Good     | Non-Toxin (0.1250) | 1212.32 |
| LDSL             | 25.15 | 446.2376  | 4  | 2.5  | 447.246  | 27.91 | 7.9793E7 | 32420 | 0.2676 | Good     | Non-Toxin (0.2450) | 446.50  |
| AFAVIANPDAGRINIE | 27.14 | 1669.8787 | 16 | 3.1  | 835.9492 | 37.05 | 1.1167E6 | 44276 | 0.2670 | Good     | Non-Toxin (0.2350) | 1670.89 |
| VAM              | 22.18 | 319.1566  | 3  | 2    | 320.1645 | 10.56 | 5.7905E6 | 10508 | 0.2643 | Good     | Non-Toxin (0.2500) | 319.43  |
| VAGL             | 26.95 | 358.2216  | 4  | 1.1  | 359.2293 | 18.59 | 3.2496E7 | 20375 | 0.2642 | Good     | Non-Toxin (0.2200) | 358.44  |
| DAAL             | 20.27 | 388.1958  | 4  | 3.8  | 389.2045 | 10.73 | 1.4001E7 | 9418  | 0.2619 | Good     | Non-Toxin (0.1550) | 388.42  |
| TPSPT            | 22.22 | 501.2435  | 5  | 2.1  | 502.2518 | 10.94 | 1.9367E7 | 10369 | 0.2602 | Good     | Non-Toxin (0.1800) | 501.54  |
| FALNQDNNDFVDSL   | 20.23 | 1837.8483 | 16 | 0.5  | 919.9319 | 47.26 | 6.5948E5 | 57609 | 0.2594 | Good     | Non-Toxin (0.1300) | 1838.95 |
| VAGG             | 22.25 | 302.159   | 4  | 1.5  | 303.1667 | 1.51  | 4.3878E7 | 155   | 0.2581 | Good     | Non-Toxin (0.2000) | 302.33  |
| VGPSVP           | 22.34 | 554.3064  | 6  | 3.1  | 555.3154 | 21.85 | 2.3841E7 | 24828 | 0.2568 | Good     | Non-Toxin (0.3400) | 554.64  |
| AFQVIANPDAGRINIE | 35.72 | 1726.9001 | 16 | 4.5  | 864.4612 | 36.27 | 2.4615E6 | 43150 | 0.2566 | Good     | Non-Toxin (0.1700) | 1727.94 |
| ISL              | 25.63 | 331.2107  | 3  | 0.9  | 332.2183 | 22.19 | 2.2317E9 | 28423 | 0.2562 | Good     | Non-Toxin (0.3250) | 331.41  |
| GTLP             | 20.15 | 487.2642  | 5  | 3.1  | 488.273  | 16.56 | 2.9731E8 | 18180 | 0.2556 | Good     | Non-Toxin (0.2200) | 487.55  |
| NIL              | 26.86 | 358.2216  | 3  | 2.8  | 359.2299 | 22.86 | 5.4643E8 | 26311 | 0.2552 | Good     | Non-Toxin (0.3750) | 358.44  |
| DIPVDQPA         | 27.43 | 853.4181  | 8  | 0.2  | 854.4255 | 23.94 | 1.6539E6 | 27584 | 0.2532 | Good     | Non-Toxin (0.1950) | 853.93  |
| ALNQDNNDFVDSLVDG | 27.62 | 2108.9651 | 19 | 6.2  | 1055.496 | 50.64 | 5.5407E5 | 61908 | 0.2488 | Good     | Non-Toxin (0.1350) | 2110.22 |
| IPV              | 27.17 | 327.2158  | 3  | 1.5  | 328.2235 | 30    | 7.1771E8 | 34810 | 0.2457 | Good     | Non-Toxin (0.2800) | 327.42  |
| GNNQOPVLN        | 26.21 | 982.4832  | 9  | 0.9  | 492.2493 | 17.23 | 2.5016E6 | 18608 | 0.2454 | Moderate | Non-Toxin (0.1600) | 983.05  |
| KSIP             | 21.32 | 443.2744  | 4  | 1.4  | 444.2823 | 17.52 | 9.9549E6 | 19617 | 0.2435 | Good     | Toxin (0.4750)     | 443.54  |
| DTLL             | 25.66 | 460.2533  | 4  | 2.6  | 461.2617 | 24.83 | 4.5148E7 | 28557 | 0.2395 | Good     | Non-Toxin (0.3100) | 460.53  |
| SLLK             | 20.66 | 459.3057  | 4  | -1.6 | 230.6597 | 17.37 | 0        | 18824 | 0.2368 | Good     | Toxin (0.8150)     | 459.59  |
| TLL              | 22.54 | 345.2264  | 3  | 0.9  | 346.234  | 22.4  | 7.0118E8 | 26000 | 0.2337 | Good     | Non-Toxin (0.2500) | 345.44  |
| FLEGLPTINH       | 24.32 | 1127.5612 | 10 | 2.1  | 564.7891 | 28.31 | 9.6739E5 | 32624 | 0.2336 | Good     | Non-Toxin (0.2100) | 1128.25 |
| LSNL             | 22.63 | 445.2536  | 4  | 1.1  | 446.2614 | 16.91 | 2.61E7   | 18638 | 0.2328 | Good     | Non-Toxin (0.3400) | 445.52  |
| AASL             | 22.03 | 360.2009  | 4  | 1    | 361.2085 | 8.08  | 2.9745E7 | 7594  | 0.2324 | Good     | Non-Toxin (0.2250) | 360.41  |
| LPST             | 26.53 | 416.2271  | 4  | 1.4  | 417.2349 | 12.75 | 2.0244E8 | 12613 | 0.2321 | Good     | Non-Toxin (0.2750) | 416.47  |
| ALNQDNNDFVDSL    | 24.79 | 1690.7798 | 15 | 2.8  | 846.3995 | 43.52 | 2.3887E5 | 52715 | 0.2319 | Good     | Non-Toxin (0.1550) | 1691.77 |
| PLE              | 25.58 | 357.19    | 3  | 1.8  | 358.1979 | 25.23 | 1.3005E7 | 29235 | 0.2305 | Good     | Toxin (0.4800)     | 357.41  |
| PAIT             | 20.3  | 400.2322  | 4  | 3.5  | 401.2408 | 18.39 | 3.7387E7 | 20446 | 0.2299 | Good     | Non-Toxin (0.1150) | 400.48  |
| EYP              | 21.13 | 407.1692  | 3  | 2.1  | 408.1774 | 28.34 | 6.3657E6 | 33710 | 0.2274 | Good     | Toxin (0.3850)     | 407.42  |
| LLLLLILTHPT      | 24.71 | 1358.8901 | 12 | -5.3 | 680.4487 | 51.16 | 0        | 62480 | 0.2273 | Poor     | Non-Toxin (0.2750) | 1359.76 |
| QLI              | 21.16 | 372.2372  | 3  | 0.9  | 373.2448 | 23.4  | 3.9028E7 | 27006 | 0.2257 | Good     | Non-Toxin (0.2550) | 372.46  |
| VGPSVPSIE        | 20.14 | 883.4651  | 9  | 2    | 884.4741 | 30.27 | 4.2909E6 | 35054 | 0.2256 | Good     | Non-Toxin (0.1800) | 884.00  |
| VLL              | 21.08 | 343.2471  | 3  | 0.9  | 344.2547 | 23.51 | 1.1138E9 | 27447 | 0.2249 | Good     | Toxin (0.4650)     | 343.47  |

|                |       |           |    |      |          |       |          |       |        |          |                    |         |
|----------------|-------|-----------|----|------|----------|-------|----------|-------|--------|----------|--------------------|---------|
| PVSSP          | 20.29 | 485.2485  | 5  | 3.1  | 486.2573 | 8.3   | 1.9786E7 | 5792  | 0.2249 | Good     | Non-Toxin (0.1200) | 485.54  |
| LDVP           | 21.94 | 442.2427  | 4  | 0.5  | 443.2502 | 18.75 | 5.6304E6 | 20737 | 0.2246 | Good     | Non-Toxin (0.1400) | 442.51  |
| KSP            | 24.85 | 330.1903  | 3  | 1.3  | 331.198  | 6.7   | 8.0603E7 | 3962  | 0.2229 | Good     | Non-Toxin (0.3100) | 330.38  |
| AVP            | 24.34 | 285.1688  | 3  | 1.9  | 286.1766 | 8.42  | 2.4568E8 | 9774  | 0.2225 | Good     | Non-Toxin (0.1500) | 285.34  |
| LAVP           | 25.73 | 398.2529  | 4  | 2.9  | 399.2613 | 20.8  | 1.0518E9 | 27213 | 0.2220 | Good     | Non-Toxin (0.1350) | 398.50  |
| RIYDPHQPT      | 27.51 | 1125.5566 | 9  | 2.9  | 563.7872 | 15.13 | 2.7519E6 | 15767 | 0.2201 | Good     | Non-Toxin (0.1550) | 1126.24 |
| LSTP           | 24.84 | 416.2271  | 4  | 1    | 417.2348 | 15.05 | 1.0259E8 | 16896 | 0.2196 | Good     | Non-Toxin (0.2350) | 416.47  |
| LELP           | 21.38 | 470.274   | 4  | 0.7  | 471.2816 | 29.99 | 1.4778E8 | 35512 | 0.2188 | Good     | Toxin (0.4200)     | 470.57  |
| YEP            | 22.73 | 407.1692  | 3  | -0.1 | 408.1765 | 23.64 | 8.3658E6 | 27975 | 0.2182 | Good     | Non-Toxin (0.3000) | 407.42  |
| ECl            | 23.67 | 363.1464  | 3  | -7   | 364.1511 | 28.37 | 5.163E6  | 32823 | 0.2079 | Good     | Toxin (0.9300)     | 363.44  |
| INPV           | 20.48 | 441.2587  | 4  | 1.8  | 442.2668 | 16.37 | 5.2779E8 | 17510 | 0.2068 | Good     | Non-Toxin (0.2850) | 441.53  |
| PAV            | 23.96 | 285.1688  | 3  | -0.2 | 286.1761 | 23.66 | 9.7883E6 | 27318 | 0.2042 | Good     | Non-Toxin (0.1500) | 285.34  |
| TIPA           | 22.04 | 400.2322  | 4  | 3.3  | 401.2408 | 13.44 | 1.0951E8 | 13561 | 0.2040 | Good     | Non-Toxin (0.2200) | 400.48  |
| LVG            | 21.48 | 287.1845  | 3  | 2.1  | 288.1924 | 2.1   | 3.8963E8 | 2797  | 0.2034 | Good     | Toxin (0.4000)     | 287.36  |
| TLPIDPS        | 20.88 | 741.3909  | 7  | 3    | 742.4004 | 27.73 | 1.9847E7 | 31682 | 0.2012 | Good     | Non-Toxin (0.2850) | 741.84  |
| VAP            | 22.71 | 285.1688  | 3  | 2.5  | 286.1768 | 7.1   | 3.7919E8 | 6465  | 0.1990 | Good     | Non-Toxin (0.1800) | 285.34  |
| VLR            | 21.79 | 386.2641  | 3  | 2.7  | 387.2725 | 7.14  | 6.8949E7 | 6048  | 0.1980 | Good     | Non-Toxin (0.2550) | 386.49  |
| ITAP           | 20.8  | 400.2322  | 4  | 2.6  | 401.2405 | 8.39  | 7.4157E7 | 9906  | 0.1965 | Good     | Non-Toxin (0.1100) | 400.48  |
| SVAP           | 22.86 | 372.2009  | 4  | 2.2  | 373.209  | 8.01  | 7.9733E7 | 7798  | 0.1950 | Good     | Non-Toxin (0.1750) | 372.42  |
| GIV            | 23.73 | 287.1845  | 3  | 2.1  | 288.1924 | 14.27 | 2.5358E8 | 14792 | 0.1908 | Good     | Non-Toxin (0.2400) | 287.36  |
| ISTP           | 24.84 | 416.2271  | 4  | 1    | 417.2348 | 15.05 | 1.0259E8 | 16896 | 0.1904 | Good     | Non-Toxin (0.1800) | 416.47  |
| LATL           | 22.78 | 416.2635  | 4  | 1.9  | 417.2715 | 22.03 | 3.7756E7 | 25048 | 0.1901 | Good     | Non-Toxin (0.2000) | 416.52  |
| LCTT           | 27.29 | 436.1992  | 4  | 1.3  | 219.1071 | 27.64 | 4.0474E6 | 32523 | 0.1893 | Good     | Toxin (0.7700)     | 436.53  |
| LIVG           | 25.55 | 400.2686  | 4  | 2.3  | 401.2767 | 19.93 | 9.8255E6 | 22182 | 0.1872 | Good     | Toxin (0.4200)     | 400.52  |
| TPLS           | 20.28 | 416.2271  | 4  | 1.8  | 417.2351 | 8.26  | 9.2488E7 | 7917  | 0.1869 | Good     | Toxin (0.4050)     | 416.47  |
| IEPI           | 22.16 | 470.274   | 4  | 0.7  | 471.2816 | 29.99 | 1.6765E8 | 34791 | 0.1865 | Good     | Non-Toxin (0.2450) | 470.57  |
| LTPK           | 22.39 | 457.29    | 4  | 1.9  | 458.2982 | 8.25  | 2.0295E7 | 8326  | 0.1848 | Good     | Non-Toxin (0.3300) | 457.57  |
| TLGA           | 22.98 | 360.2009  | 4  | 1    | 361.2085 | 8.08  | 2.9745E7 | 7144  | 0.1832 | Good     | Non-Toxin (0.2200) | 360.41  |
| LAVDL          | 20.98 | 529.3112  | 5  | 5.6  | 530.3214 | 32.18 | 6.515E6  | 37703 | 0.1822 | Good     | Non-Toxin (0.1200) | 529.63  |
| VGGV           | 24.38 | 330.1903  | 4  | -1   | 331.1973 | 7.96  | 1.4451E8 | 6641  | 0.1799 | Good     | Toxin (0.5600)     | 330.38  |
| FALNQDNNDFVDIS | 35.26 | 1724.7642 | 15 | -0.2 | 863.8892 | 39.59 | 1.7323E7 | 47587 | 0.1795 | Good     | Non-Toxin (0.1350) | 1725.79 |
| FALNQDNNDFVDIS | 31.51 | 1725.7482 | 15 | 4.5  | 863.8853 | 40.63 | 7.8686E6 | 49092 | 0.1795 | Good     | Non-Toxin (0.1350) | 1725.79 |
| EIP            | 26.3  | 357.19    | 3  | 0.1  | 358.1973 | 16.41 | 2.7834E7 | 16876 | 0.1781 | Good     | Non-Toxin (0.3400) | 357.41  |
| LTAAL          | 21.16 | 487.3006  | 5  | 2    | 488.3088 | 29.46 | 3.0011E6 | 34024 | 0.1759 | Good     | Non-Toxin (0.1050) | 487.60  |
| VSLY           | 24.22 | 480.2584  | 4  | 2.3  | 481.2668 | 24.25 | 2.7237E8 | 28128 | 0.1747 | Good     | Non-Toxin (0.1500) | 480.56  |
| VSLSP          | 21.8  | 501.2798  | 5  | 2.1  | 502.2882 | 20.55 | 2.2651E7 | 22896 | 0.1699 | Good     | Non-Toxin (0.2450) | 501.58  |
| VVVF           | 26.93 | 462.2842  | 4  | 2.5  | 463.2927 | 30.82 | 3.7232E6 | 36210 | 0.1655 | Good     | Non-Toxin (0.1900) | 462.59  |
| SYK            | 22.59 | 396.2009  | 3  | -5.7 | 397.2059 | 11.88 | 2.8454E7 | 11637 | 0.1655 | Good     | Non-Toxin (0.3150) | 396.44  |
| PSIE           | 24.42 | 444.222   | 4  | 2.9  | 445.2305 | 20.26 | 6.9988E6 | 23143 | 0.1627 | Good     | Non-Toxin (0.2800) | 444.49  |
| VLPV           | 22.52 | 426.2842  | 4  | 2.5  | 427.2925 | 24.2  | 1.1978E9 | 28152 | 0.1607 | Good     | Toxin (0.5400)     | 426.56  |
| LGTLV          | 20.13 | 501.3162  | 5  | 3.9  | 502.3254 | 28.3  | 1.1185E7 | 32442 | 0.1596 | Good     | Non-Toxin (0.2450) | 501.62  |
| ITVLL          | 22.23 | 557.3788  | 5  | 1.9  | 558.3872 | 37.76 | 1.8164E6 | 45162 | 0.1594 | Good     | Non-Toxin (0.2950) | 557.73  |
| I AVL          | 21.92 | 527.3683  | 5  | 5.4  | 528.3784 | 37.87 | 1.0152E8 | 46153 | 0.1589 | Good     | Non-Toxin (0.1900) | 527.71  |
| LNLV           | 20.67 | 457.29    | 4  | 4.1  | 458.2992 | 28.27 | 6.2125E6 | 32493 | 0.1586 | Good     | Non-Toxin (0.3100) | 457.57  |
| KLLS           | 23.85 | 459.3057  | 4  | 3    | 460.3143 | 7.52  | 4.187E6  | 6356  | 0.1559 | Good     | Toxin (0.7750)     | 459.59  |
| SIIT           | 20.58 | 432.2584  | 4  | 2.2  | 433.2666 | 17.64 | 7.6941E7 | 19254 | 0.1557 | Good     | Non-Toxin (0.1100) | 432.52  |
| DAVL           | 21.86 | 416.2271  | 4  | 2.2  | 417.2353 | 22.99 | 1.3015E7 | 26283 | 0.1543 | Good     | Non-Toxin (0.0800) | 416.47  |
| ILT            | 21.83 | 345.2264  | 3  | 2.3  | 346.2344 | 13.95 | 2.0548E8 | 14845 | 0.1542 | Good     | Non-Toxin (0.2450) | 345.44  |
| VPS            | 20.92 | 301.1638  | 3  | 1.2  | 302.1714 | 3.9   | 2.7312E8 | 561   | 0.1535 | Good     | Non-Toxin (0.1950) | 301.34  |
| LVTIP          | 20.51 | 541.3475  | 5  | 1.8  | 542.3558 | 26.04 | 1.6908E8 | 32274 | 0.1531 | Good     | Non-Toxin (0.1850) | 541.69  |
| PIVK           | 24.46 | 455.3107  | 4  | 1.2  | 456.3185 | 21.68 | 7.127E6  | 24687 | 0.1529 | Good     | Toxin (0.4350)     | 455.60  |
| LPVV           | 24.37 | 426.2842  | 4  | 3.7  | 427.2931 | 31.23 | 2.6524E8 | 36389 | 0.1514 | Good     | Toxin (0.4600)     | 426.56  |
| I AVL          | 25.97 | 414.2842  | 4  | 2    | 415.2923 | 27.42 | 9.4513E7 | 33724 | 0.1509 | Good     | Non-Toxin (0.1550) | 414.55  |
| SSI            | 22.01 | 305.1587  | 3  | 0.7  | 306.1662 | 3.9   | 3.18E7   | 2931  | 0.1502 | Good     | Non-Toxin (0.2350) | 305.33  |
| VLSL           | 23.05 | 430.2791  | 4  | 3.5  | 431.2879 | 21.42 | 3.469E6  | 24148 | 0.1500 | Good     | Non-Toxin (0.3350) | 430.54  |
| ALNQDNNDFVDIS  | 23.09 | 1577.6958 | 14 | 0.8  | 789.8558 | 33.14 | 2.866E6  | 39176 | 0.1499 | Good     | Non-Toxin (0.1500) | 1578.61 |
| VTLP           | 22.14 | 428.2635  | 4  | 1.8  | 429.2715 | 22.63 | 1.7513E9 | 29296 | 0.1496 | Good     | Non-Toxin (0.2650) | 428.53  |
| ISSI           | 23.19 | 418.2427  | 4  | 3.2  | 419.2513 | 18.2  | 2.6637E6 | 20121 | 0.1489 | Good     | Non-Toxin (0.2000) | 418.49  |
| KGS            | 20.79 | 290.159   | 3  | -7.4 | 291.1641 | 7.23  | 4.5781E5 | 5975  | 0.1482 | Good     | Toxin (0.3950)     | 290.32  |
| LATDLVQVR      | 30.41 | 1013.5869 | 9  | -0.4 | 507.8005 | 27.47 | 2.7842E6 | 31545 | 0.1477 | Good     | Non-Toxin (0.1450) | 1014.19 |
| I AVG          | 26.13 | 358.2216  | 4  | 2.7  | 359.2299 | 14.12 | 3.6045E7 | 14596 | 0.1475 | Good     | Non-Toxin (0.3450) | 358.44  |
| DLK            | 24.8  | 374.2165  | 3  | 1.4  | 375.2243 | 6.04  | 1.2706E7 | 4134  | 0.1464 | Good     | Toxin (0.5850)     | 374.44  |
| APTSSSS        | 20.56 | 732.329   | 8  | 2    | 367.1725 | 14.55 | 0        | 15215 | 0.1457 | Moderate | Non-Toxin (0.0950) | 732.75  |
| LTSL           | 21.69 | 432.2584  | 4  | 2.3  | 433.2667 | 18.79 | 3.4184E7 | 20832 | 0.1442 | Good     | Non-Toxin (0.2500) | 432.52  |
| QITVAPGT       | 25.7  | 785.4283  | 8  | 2.8  | 786.4377 | 22.19 | 1.9067E6 | 25354 | 0.1432 | Moderate | Non-Toxin (0.1400) | 785.90  |
| LAK            | 24.47 | 330.2267  | 3  | 0.1  | 331.234  | 10.03 | 6.6547E6 | 8997  | 0.1428 | Good     | Toxin (0.6000)     | 330.43  |
| TVLP           | 23.62 | 428.2635  | 4  | 0.8  | 429.2711 | 26.07 | 1.2958E9 | 30581 | 0.1412 | Good     | Non-Toxin (0.3750) | 428.53  |
| VSAL           | 25.34 | 388.2322  | 4  | 1.7  | 389.2401 | 16.71 | 3.8079E7 | 17761 | 0.1410 | Good     | Non-Toxin (0.1650) | 388.46  |
| AVL            | 24.69 | 301.2001  | 3  | 3    | 302.2083 | 15.38 | 2.502E8  | 16791 | 0.1403 | Good     | Non-Toxin (0.1650) | 301.39  |
| DVVSLY         | 20.05 | 694.3538  | 6  | 4.5  | 695.3641 | 33.09 | 1.3838E6 | 39145 | 0.1394 | Good     | Non-Toxin (0.0850) | 694.78  |
| STL            | 24.68 | 319.1743  | 3  | 0.6  | 320.1818 | 6.15  | 1.3144E8 | 5171  | 0.1389 | Good     | Non-Toxin (0.1600) | 319.36  |
| GIITD          | 20.22 | 517.2748  | 5  | 3.6  | 518.2839 | 19.99 | 2.3243E7 | 22039 | 0.1380 | Good     | Non-Toxin (0.1100) | 517.58  |
| LVPV           | 22.82 | 426.2842  | 4  | 3.7  | 427.2931 | 31.23 | 1.1176E7 | 37139 | 0.1372 | Good     | Non-Toxin (0.3150) | 426.56  |
| TAAL           | 24.46 | 374.2165  | 4  | 1.8  | 375.2245 | 7.81  | 4.7573E7 | 7274  | 0.1371 | Good     | Non-Toxin (0.1050) | 374.44  |
| IKK            | 25.94 | 372.2736  | 3  | 0.6  | 373.2811 | 25.82 | 3.0791E8 | 30084 | 0.1368 | Good     | Toxin (0.7150)     | 372.51  |
| IVL            | 22.76 | 343.2471  | 3  | 0.9  | 344.2547 | 26.45 | 1.0971E9 | 30675 | 0.1367 | Good     | Non-Toxin (0.2800) | 343.47  |
| ITY            | 21.85 | 395.2056  | 3  | 0.8  | 396.2132 | 25.3  | 2.2634E7 | 29064 | 0.1329 | Good     | Non-Toxin (0.0650) | 395.46  |
| LLDV           | 20.36 | 458.274   | 4  | 3.2  | 459.2828 | 33.91 | 1.0122E6 | 39946 | 0.1326 | Good     | Non-Toxin (0.2650) | 458.56  |
| KVP            | 22.82 | 342.2267  | 3  | 0.9  | 343.2343 | 10.99 | 2.6716E7 | 10061 | 0.1300 | Good     | Toxin (0.4150)     | 342.44  |
| AVLA           | 23.74 | 372.2372  | 4  | 2.1  | 373.2453 | 13.79 | 2.3269E7 | 14118 | 0.1297 | Good     | Non-Toxin (0.1050) | 372.46  |
| DTL            | 26.12 | 347.1693  | 3  | 1.1  | 348.1769 | 8.41  | 3.8914E7 | 7316  | 0.1292 | Good     | Non-Toxin (0.2700) | 347.37  |
| LSAS           | 23.65 | 376.1958  | 4  | 5.1  | 377.205  | 4.43  | 3.725E7  | 2309  | 0.1276 | Good     | Non-Toxin (0.2900) | 376.41  |
| LVVP           | 23.71 | 426.2842  | 4  | 3.7  | 427.2931 | 31.23 | 1.3464E9 | 35455 | 0.1256 | Good     | Non-Toxin (0.2050) | 426.56  |
| LNIPAVQ        | 26.42 | 753.4385  | 7  | 3.5  | 754.4484 | 31.21 | 2.5078E6 | 36396 | 0.1250 | Good     | Non-Toxin (0.2450) | 753.90  |
| TDL            | 26.68 | 347.1693  | 3  | 1.1  | 348.1769 | 8.41  | 3.8914E7 | 9948  | 0.1221 | Good     | Non-Toxin (0.2500) | 347.37  |
| BSLV           | 21.84 | 430.2791  | 4  | 2.8  | 431.2876 | 25.73 | 2.0701E7 | 29968 | 0.1215 | Good     | Non-Toxin (0.2350) | 430.54  |
| VTIP           | 22.14 | 428.2635  | 4  | 1.8  | 429.2715 | 22.63 | 1.7513E9 | 29296 | 0.1204 | Good     | Non-Toxin (0.1800) | 428.53  |

|                 |       |           |    |      |          |       |          |       |        |      |                    |         |
|-----------------|-------|-----------|----|------|----------|-------|----------|-------|--------|------|--------------------|---------|
| IVPV            | 22.82 | 426.2842  | 4  | 3.7  | 427.2931 | 31.23 | 1.1176E7 | 37139 | 0.1203 | Good | Non-Toxin (0.2450) | 426.56  |
| VYI             | 22.09 | 393.2263  | 3  | 1.9  | 394.2344 | 22.95 | 4.6387E6 | 26333 | 0.1196 | Good | Non-Toxin (0.1250) | 393.48  |
| LIAV            | 25.28 | 414.2842  | 4  | 1.4  | 415.2921 | 24.02 | 1.2473E8 | 28097 | 0.1194 | Good | Non-Toxin (0.2150) | 414.55  |
| VIR             | 21.79 | 386.2641  | 3  | 2.7  | 387.2725 | 7.14  | 6.8949E7 | 6048  | 0.1168 | Good | Non-Toxin (0.3100) | 386.49  |
| SHK             | 20.03 | 370.1965  | 3  | 3.3  | 371.205  | 6.97  | 2.8206E6 | 5873  | 0.1155 | Good | Non-Toxin (0.3400) | 370.41  |
| VDL             | 26.31 | 345.19    | 3  | 2    | 346.1979 | 18.43 | 9.4985E8 | 20394 | 0.1141 | Good | Non-Toxin (0.2250) | 345.40  |
| VLAI            | 20.32 | 414.2842  | 4  | 2.1  | 415.2924 | 23.29 | 4.2704E6 | 26834 | 0.1126 | Good | Non-Toxin (0.1900) | 414.55  |
| LAT             | 24.49 | 303.1794  | 3  | 1.3  | 304.1871 | 2.08  | 1.0833E8 | 4084  | 0.1122 | Good | Non-Toxin (0.1500) | 303.36  |
| VPSIE           | 23.16 | 543.2904  | 5  | 2.1  | 544.2988 | 20.26 | 5.8956E8 | 22563 | 0.1121 | Good | Non-Toxin (0.1250) | 543.62  |
| VLA             | 23.85 | 301.2001  | 3  | 2.7  | 302.2082 | 7.26  | 5.823E8  | 5871  | 0.1112 | Good | Non-Toxin (0.1750) | 301.39  |
| TSL             | 25.7  | 319.1743  | 3  | 3.4  | 320.1827 | 8.4   | 3.0863E7 | 8010  | 0.1108 | Good | Non-Toxin (0.2350) | 319.36  |
| LVVDL           | 21.78 | 557.3425  | 5  | -0.2 | 558.3496 | 35.54 | 4.5864E6 | 42220 | 0.1107 | Good | Non-Toxin (0.1900) | 557.69  |
| LPVE            | 22.85 | 456.2584  | 4  | 3.7  | 457.2673 | 17.93 | 7.4793E8 | 20044 | 0.1093 | Good | Non-Toxin (0.2850) | 456.54  |
| QVY             | 24.29 | 408.2009  | 3  | -1.2 | 409.2077 | 12.57 | 4.4483E6 | 12313 | 0.1090 | Good | Non-Toxin (0.0800) | 408.45  |
| ATSGELATDLVQVR  | 42.34 | 1458.7678 | 14 | 6.1  | 730.3956 | 32.29 | 2.4496E6 | 37992 | 0.1086 | Good | Non-Toxin (0.1100) | 1459.62 |
| LAAG            | 22.34 | 372.2372  | 4  | 0.7  | 373.2448 | 19.1  | 1.0759E7 | 20959 | 0.1070 | Good | Non-Toxin (0.0950) | 372.46  |
| VLVG            | 20.57 | 386.2529  | 4  | 2.1  | 387.261  | 15.95 | 2.3041E7 | 16819 | 0.1054 | Good | Toxin (0.3800)     | 386.49  |
| IAAT            | 24.4  | 374.2165  | 4  | -7.7 | 375.2209 | 35.66 | 2.5302E7 | 42211 | 0.1050 | Good | Non-Toxin (0.1150) | 374.44  |
| TVIP            | 23.62 | 428.2635  | 4  | 0.8  | 429.2711 | 26.07 | 1.2958E9 | 30581 | 0.1050 | Good | Non-Toxin (0.2550) | 428.53  |
| TSGELATDLVQVR   | 30.94 | 1387.7307 | 13 | 2.5  | 694.8744 | 31.69 | 7.1255E5 | 37199 | 0.1050 | Good | Non-Toxin (0.1150) | 1388.54 |
| TPEI            | 21.02 | 458.2376  | 4  | 1.9  | 459.2458 | 19.49 | 9.0629E6 | 21493 | 0.1045 | Good | Non-Toxin (0.1750) | 458.51  |
| QLV             | 21.9  | 358.2216  | 3  | 1.3  | 359.2294 | 14.6  | 2.9559E7 | 15393 | 0.1043 | Good | Non-Toxin (0.1500) | 358.44  |
| TIGT            | 22.98 | 390.2115  | 4  | 2.5  | 391.2197 | 7.45  | 1.975E7  | 6502  | 0.1039 | Good | Non-Toxin (0.1850) | 390.44  |
| ITVAP           | 21.54 | 499.3006  | 5  | 1.2  | 500.3085 | 24.34 | 4.8593E7 | 28056 | 0.1031 | Good | Non-Toxin (0.1550) | 499.61  |
| NVL             | 21.28 | 344.206   | 3  | 2    | 345.2139 | 14.38 | 4.0603E8 | 16494 | 0.1029 | Good | Non-Toxin (0.2550) | 344.41  |
| IGVT            | 21.89 | 388.2322  | 4  | 3    | 389.2406 | 17.53 | 5.143E8  | 18838 | 0.1029 | Good | Non-Toxin (0.1150) | 388.46  |
| TVP             | 26.65 | 315.1794  | 3  | 0.9  | 316.187  | 13.97 | 7.5473E8 | 15778 | 0.1027 | Good | Non-Toxin (0.1450) | 315.37  |
| LSAV            | 22.11 | 388.2322  | 4  | 2.6  | 389.2405 | 13.62 | 2.7195E8 | 14643 | 0.1004 | Good | Non-Toxin (0.2500) | 388.46  |
| AVLK            | 22.44 | 429.2951  | 4  | 2.5  | 430.3035 | 4.64  | 5.4239E6 | 3124  | 0.0996 | Good | Toxin (0.5850)     | 429.56  |
| VTP             | 24.07 | 315.1794  | 3  | 0.9  | 316.187  | 13.97 | 1.9292E8 | 15009 | 0.0984 | Good | Non-Toxin (0.1250) | 315.37  |
| AEL             | 22.42 | 331.1743  | 3  | 3.2  | 332.1826 | 12.75 | 1.6944E6 | 12719 | 0.0975 | Good | Non-Toxin (0.2750) | 331.37  |
| VVP             | 20.7  | 313.2001  | 3  | 1.2  | 314.2078 | 22.99 | 1.088E8  | 26244 | 0.0960 | Good | Non-Toxin (0.1200) | 313.40  |
| LSVA            | 20.48 | 388.2322  | 4  | 2.6  | 389.2405 | 13.62 | 2.7195E8 | 14685 | 0.0943 | Good | Non-Toxin (0.3700) | 388.46  |
| TVAP            | 20.07 | 386.2165  | 4  | 1    | 387.2242 | 14.6  | 1.6232E8 | 16819 | 0.0936 | Good | Non-Toxin (0.1750) | 386.45  |
| IVAI            | 22.3  | 414.2842  | 4  | 1.4  | 415.2921 | 24.02 | 1.2473E8 | 27627 | 0.0933 | Good | Non-Toxin (0.2800) | 414.55  |
| VDAI            | 21.17 | 416.2271  | 4  | 0.9  | 417.2347 | 16.33 | 5.099E7  | 18702 | 0.0926 | Good | Non-Toxin (0.1450) | 416.47  |
| AIV             | 23.19 | 301.2001  | 3  | 2.6  | 302.2082 | 14.62 | 6.74E7   | 15234 | 0.0926 | Good | Non-Toxin (0.2450) | 301.39  |
| IFRT            | 20.15 | 489.2911  | 4  | -9.3 | 490.2938 | 36.04 | 3.6189E6 | 42843 | 0.0914 | Good | Non-Toxin (0.1700) | 489.57  |
| VALK            | 20.95 | 429.2951  | 4  | 3.4  | 430.3038 | 10.21 | 6.292E6  | 9209  | 0.0910 | Good | Toxin (0.6500)     | 429.56  |
| ITVL            | 24.75 | 444.2948  | 4  | 4.4  | 445.304  | 28.14 | 1.0333E8 | 33841 | 0.0876 | Good | Non-Toxin (0.1200) | 444.57  |
| VSAI            | 25.34 | 388.2322  | 4  | 1.7  | 389.2401 | 16.71 | 3.8079E7 | 17761 | 0.0875 | Good | Non-Toxin (0.2000) | 388.46  |
| DVVSL           | 23.91 | 531.2904  | 5  | 4.1  | 532.2999 | 29.23 | 1.5611E7 | 33825 | 0.0874 | Good | Non-Toxin (0.0850) | 531.61  |
| TTSP            | 25.14 | 404.1907  | 4  | 1.5  | 203.1029 | 5.79  | 0        | 4349  | 0.0874 | Good | Non-Toxin (0.1300) | 404.42  |
| KVL             | 26.23 | 358.258   | 3  | 1.7  | 359.2659 | 21.12 | 1.7281E9 | 23822 | 0.0859 | Good | Toxin (0.6300)     | 358.48  |
| TVDP            | 21.16 | 430.2064  | 4  | 1.9  | 431.2144 | 13.19 | 1.219E7  | 13105 | 0.0859 | Good | Non-Toxin (0.0850) | 430.46  |
| VDLK            | 24.33 | 473.2849  | 4  | 2.3  | 474.2933 | 13.22 | 2.0635E6 | 13363 | 0.0855 | Good | Toxin (0.4550)     | 473.57  |
| VPVT            | 21.84 | 414.2478  | 4  | 3.4  | 415.2565 | 11.05 | 8.3687E7 | 11042 | 0.0835 | Good | Non-Toxin (0.1500) | 414.50  |
| TVGI            | 27.05 | 388.2322  | 4  | 3.1  | 389.2407 | 20.77 | 5.3157E7 | 24641 | 0.0812 | Good | Non-Toxin (0.2950) | 388.46  |
| TAI             | 22.78 | 303.1794  | 3  | 1.3  | 304.1871 | 2.08  | 5.7596E8 | 3152  | 0.0802 | Good | Non-Toxin (0.1700) | 303.36  |
| TPVT            | 26.97 | 416.2271  | 4  | 1.8  | 417.2351 | 6.23  | 4.3982E8 | 5245  | 0.0798 | Good | Non-Toxin (0.1550) | 416.47  |
| VDLS            | 22.46 | 432.222   | 4  | 1.7  | 433.23   | 13.89 | 6.4257E7 | 14388 | 0.0795 | Good | Non-Toxin (0.3000) | 432.47  |
| DIV             | 25.07 | 345.19    | 3  | 3.8  | 346.1985 | 12.85 | 1.9985E8 | 12644 | 0.0793 | Good | Non-Toxin (0.1450) | 345.40  |
| VAI             | 25.48 | 301.2001  | 3  | 1.2  | 302.2078 | 17.71 | 1.1745E9 | 19396 | 0.0782 | Good | Non-Toxin (0.2500) | 301.39  |
| LVVVL           | 20.62 | 541.3839  | 5  | 5.5  | 542.3942 | 37.33 | 1.0253E6 | 44784 | 0.0781 | Good | Non-Toxin (0.2000) | 541.73  |
| DAV             | 24.68 | 303.143   | 3  | 0.3  | 304.1504 | 7.51  | 1.4685E6 | 6541  | 0.0758 | Good | Non-Toxin (0.0850) | 303.32  |
| VVDL            | 25.11 | 444.2584  | 4  | 2    | 445.2665 | 22.76 | 5.1766E8 | 25996 | 0.0740 | Good | Non-Toxin (0.1200) | 444.53  |
| DTI             | 26.12 | 347.1693  | 3  | 1.1  | 348.1769 | 8.41  | 3.8914E7 | 7316  | 0.0740 | Good | Non-Toxin (0.2350) | 347.37  |
| VSLT            | 25.1  | 418.2427  | 4  | 2.6  | 419.2511 | 16.56 | 7.3224E6 | 17870 | 0.0739 | Good | Non-Toxin (0.1450) | 418.49  |
| IIVT            | 27.07 | 444.2948  | 4  | 3.7  | 445.3037 | 19.96 | 6.8984E7 | 22306 | 0.0720 | Good | Non-Toxin (0.1400) | 444.57  |
| TATSGELATDLVQVR | 38.22 | 1559.8154 | 15 | 6.4  | 780.92   | 32.81 | 4.0842E5 | 38771 | 0.0718 | Good | Non-Toxin (0.1150) | 1560.72 |
| VTPP            | 27.64 | 416.2271  | 4  | 0.8  | 417.2347 | 16.33 | 1.6023E8 | 19311 | 0.0705 | Good | Non-Toxin (0.1000) | 416.47  |
| VEGI            | 23.8  | 416.2271  | 4  | 1    | 417.2348 | 22.38 | 3.5665E7 | 25821 | 0.0697 | Good | Non-Toxin (0.2000) | 416.47  |
| VLAT            | 22.76 | 402.2478  | 4  | 4.1  | 403.2568 | 10.49 | 3.7798E7 | 10469 | 0.0696 | Good | Non-Toxin (0.1150) | 402.49  |
| VSI             | 26.49 | 317.1951  | 3  | 3.6  | 318.2035 | 18.29 | 4.7808E8 | 20504 | 0.0693 | Good | Non-Toxin (0.3000) | 317.39  |
| VLAU            | 24.03 | 400.2686  | 4  | 2    | 401.2766 | 21.65 | 6.9078E8 | 25160 | 0.0686 | Good | Non-Toxin (0.1100) | 400.52  |
| VVSL            | 26.04 | 416.2635  | 4  | 1.9  | 417.2715 | 22.03 | 2.335E7  | 25821 | 0.0675 | Good | Non-Toxin (0.1600) | 416.52  |
| IVAS            | 24.91 | 388.2322  | 4  | 1.2  | 389.2399 | 7.42  | 9.488E6  | 5663  | 0.0672 | Good | Non-Toxin (0.2250) | 388.46  |
| LSE             | 23.07 | 347.1693  | 3  | 1.1  | 348.1769 | 8.41  | 3.8914E7 | 9180  | 0.0640 | Good | Non-Toxin (0.3100) | 347.37  |
| TVTP            | 23.3  | 416.2271  | 4  | 1.7  | 417.2351 | 8.26  | 2.0357E8 | 9596  | 0.0632 | Good | Non-Toxin (0.1000) | 416.47  |
| LVAT            | 20.3  | 402.2478  | 4  | 4.1  | 403.2568 | 10.49 | 2.2019E7 | 10522 | 0.0622 | Good | Non-Toxin (0.1950) | 402.49  |
| VSI             | 25.1  | 418.2427  | 4  | 2.6  | 419.2511 | 16.56 | 7.3224E6 | 17870 | 0.0620 | Good | Non-Toxin (0.0600) | 418.49  |
| LSVT            | 23.76 | 418.2427  | 4  | 1.9  | 419.2508 | 15.85 | 5.0471E6 | 17035 | 0.0619 | Good | Non-Toxin (0.2400) | 418.49  |
| LTAV            | 23.22 | 402.2478  | 4  | 2.2  | 403.256  | 18.08 | 3.29E8   | 21708 | 0.0617 | Good | Non-Toxin (0.0900) | 402.49  |
| LSVV            | 20.21 | 416.2635  | 4  | 0.4  | 417.2709 | 21.61 | 1.1858E7 | 24062 | 0.0597 | Good | Non-Toxin (0.2950) | 416.52  |
| LIT             | 20.02 | 333.19    | 3  | 1.4  | 334.1978 | 1.6   | 1.9117E8 | 4472  | 0.0597 | Good | Non-Toxin (0.1650) | 333.38  |
| AVLE            | 20.09 | 430.2427  | 4  | 2.4  | 431.251  | 20.66 | 8.7578E7 | 25813 | 0.0597 | Good | Non-Toxin (0.2050) | 430.50  |
| VATI            | 25.64 | 402.2478  | 4  | 0.9  | 403.2555 | 26.15 | 1.0053E7 | 30744 | 0.0588 | Good | Non-Toxin (0.2100) | 402.49  |
| VGVV            | 26.55 | 372.2372  | 4  | 2.8  | 373.2455 | 16.71 | 2.0401E9 | 18028 | 0.0582 | Good | Toxin (0.4300)     | 372.47  |
| VVLN            | 24.41 | 443.2744  | 4  | 0.7  | 444.282  | 15.26 | 2.3848E7 | 16024 | 0.0576 | Good | Non-Toxin (0.1450) | 443.54  |
| ITK             | 22.83 | 360.2372  | 3  | 1.2  | 361.2449 | 1.51  | 7.759E6  | 684   | 0.0567 | Good | Non-Toxin (0.1950) | 360.45  |
| TVY             | 24.46 | 381.19    | 3  | 1.9  | 382.198  | 11.45 | 2.6658E7 | 10979 | 0.0560 | Good | Non-Toxin (0.0950) | 381.43  |
| IVK             | 23.26 | 358.258   | 3  | 0.9  | 359.2656 | 7.09  | 5.809E7  | 7501  | 0.0540 | Good | Toxin (0.4150)     | 358.48  |
| KIV             | 24.18 | 358.258   | 3  | 1.7  | 359.2659 | 21.12 | 1.2412E7 | 21851 | 0.0538 | Good | Toxin (0.5600)     | 358.48  |
| VGVG            | 27.23 | 372.2372  | 4  | 2.8  | 373.2455 | 16.71 | 8.1495E7 | 17829 | 0.0529 | Good | Toxin (0.4300)     | 372.47  |
| VLVK            | 20.31 | 457.3264  | 4  | 1.1  | 458.3342 | 7.44  | 1.6468E6 | 6280  | 0.0523 | Good | Toxin (0.4500)     | 457.61  |
| LVV             | 20.22 | 329.2314  | 3  | 3.3  | 330.2398 | 20.84 | 1.2326E8 | 23764 | 0.0508 | Good | Non-Toxin (0.2250) | 329.44  |
| VVVL            | 21.61 | 428.2999  | 4  | 2.4  | 429.3082 | 26.42 | 8.3982E7 | 30768 | 0.0503 | Good | Non-Toxin (0.1150) | 428.57  |

|      |       |          |   |      |          |       |          |       |        |      |                   |        |
|------|-------|----------|---|------|----------|-------|----------|-------|--------|------|-------------------|--------|
| DLVE | 20.05 | 474.2325 | 4 | 0.2  | 475.2399 | 20.51 | 8.6011E6 | 22759 | 0.0495 | Good | Non-Toxin(0.1700) | 474.51 |
| IVTN | 23.13 | 445.2537 | 4 | -1   | 446.2605 | 27.91 | 3.5715E7 | 32681 | 0.0493 | Good | Non-Toxin(0.1300) | 445.52 |
| ETL  | 24.05 | 361.1849 | 3 | 3.1  | 362.1933 | 10.89 | 9.5875E6 | 9695  | 0.0490 | Good | Non-Toxin(0.1700) | 361.40 |
| IVT  | 25.18 | 331.2107 | 3 | 3.1  | 332.219  | 8.39  | 5.6928E8 | 7136  | 0.0477 | Good | Non-Toxin(0.1150) | 331.41 |
| VTSI | 24.17 | 418.2427 | 4 | 2.7  | 419.2512 | 24.82 | 4.8373E6 | 28696 | 0.0475 | Good | Non-Toxin(0.1100) | 418.49 |
| TIV  | 24.6  | 331.2107 | 3 | 2.8  | 332.2189 | 14.1  | 6.5914E8 | 14887 | 0.0465 | Good | Non-Toxin(0.1450) | 331.41 |
| EVL  | 27.49 | 359.2056 | 3 | 1.3  | 360.2134 | 23.31 | 1.7151E8 | 26773 | 0.0462 | Good | Non-Toxin(0.2000) | 359.42 |
| VLE  | 20.04 | 359.2056 | 3 | 3    | 360.214  | 13.06 | 6.1121E7 | 14624 | 0.0457 | Good | Non-Toxin(0.3450) | 359.42 |
| DVK  | 24.64 | 360.2009 | 3 | 1    | 361.2085 | 8.08  | 2.9745E7 | 6872  | 0.0455 | Good | Non-Toxin(0.2300) | 360.41 |
| VTLV | 23.32 | 430.2791 | 4 | 4.4  | 431.2883 | 22.93 | 2.0538E7 | 26428 | 0.0443 | Good | Non-Toxin(0.1650) | 430.54 |
| ATVQ | 20.17 | 417.2224 | 4 | 2.6  | 418.2307 | 3.9   | 3.0994E8 | 3598  | 0.0433 | Good | Non-Toxin(0.1450) | 417.46 |
| ITV  | 23.74 | 331.2107 | 3 | 3.1  | 332.219  | 8.39  | 5.6928E8 | 11863 | 0.0431 | Good | Non-Toxin(0.0650) | 331.41 |
| VGVE | 21.3  | 402.2114 | 4 | 1.6  | 403.2194 | 5.56  | 1.6842E8 | 9162  | 0.0425 | Good | Non-Toxin(0.2850) | 402.45 |
| LTTV | 22.71 | 432.2584 | 4 | 2.3  | 433.2667 | 15.31 | 1.9784E7 | 15617 | 0.0405 | Good | Non-Toxin(0.1000) | 432.52 |
| VITI | 21.87 | 432.2584 | 4 | 2.3  | 433.2667 | 15.31 | 3.8243E7 | 15988 | 0.0403 | Good | Non-Toxin(0.0550) | 432.52 |
| VDVT | 21.99 | 432.222  | 4 | 2.7  | 433.2305 | 10.27 | 1.7313E7 | 9261  | 0.0398 | Good | Non-Toxin(0.0650) | 432.47 |
| LEV  | 25.83 | 359.2056 | 3 | 2.3  | 360.2137 | 14.66 | 1.5049E8 | 15685 | 0.0387 | Good | Non-Toxin(0.2350) | 359.42 |
| EIV  | 24.04 | 359.2056 | 3 | 2.3  | 360.2137 | 14.66 | 1.5049E8 | 15809 | 0.0375 | Good | Non-Toxin(0.3450) | 359.42 |
| IVE  | 25.73 | 359.2056 | 3 | -0.2 | 360.2128 | 19.1  | 2.3926E8 | 20789 | 0.0367 | Good | Non-Toxin(0.3100) | 359.42 |
| TEI  | 22.9  | 361.1849 | 3 | 3.1  | 362.1933 | 10.89 | 9.5875E6 | 10565 | 0.0362 | Good | Non-Toxin(0.1850) | 361.40 |
| IVEV | 21.21 | 458.274  | 4 | -1.4 | 459.2807 | 23.44 | 9.6138E6 | 26877 | 0.0314 | Good | Non-Toxin(0.3100) | 458.56 |
| VTK  | 23.07 | 346.2216 | 3 | 1.4  | 347.2294 | 7.28  | 8.8861E5 | 5811  | 0.0281 | Good | Non-Toxin(0.1700) | 346.43 |
| VVVK | 21.19 | 443.3108 | 4 | -1.8 | 222.6622 | 14.82 | 2.0762E7 | 15535 | 0.0275 | Good | Non-Toxin(0.3100) | 443.59 |
| VVVT | 24.62 | 416.2635 | 4 | 0.6  | 417.271  | 12.63 | 1.4367E7 | 12600 | 0.0252 | Good | Non-Toxin(0.0550) | 416.52 |
| VTVT | 21.3  | 418.2427 | 4 | 2    | 419.2509 | 13.2  | 4.6386E7 | 13915 | 0.0251 | Good | Non-Toxin(0.0750) | 418.49 |
| EVK  | 22.51 | 374.2165 | 3 | 1.8  | 375.2245 | 7.81  | 6.0279E7 | 5506  | 0.0238 | Good | Non-Toxin(0.2700) | 374.44 |
| TVVV | 20.17 | 416.2635 | 4 | 3.6  | 417.2722 | 18.08 | 1.749E7  | 20175 | 0.0232 | Good | Non-Toxin(0.0550) | 416.52 |
