# Supplementary material
Source: Royal Society of Chemistry journal article supplement (doi:10.1039/d6fo01257d)
Supplement: d6fo01257d2.pdf [file d6fo01257d2.pdf]

## Supplementary Information

### **Protein hydrolysates and xanthine oxidase inhibitory peptides from sunflower capitulum exert antihyperuricemic effects: A comprehensive study based on serum metabolomics and gut microbiota analysis**

Xiaoyu Liu <sup>a, b</sup>, Liyan Ma <sup>a</sup>, Zhuoyan Fan <sup>c</sup>, Jiaxing Fan <sup>a</sup>, Wanlong, Lu <sup>a</sup>, Lei Zhang <sup>a, d, \*</sup>,

Jingming Li <sup>a, b \*</sup>

<sup>a</sup> College of Food Science and Nutritional Engineering, China Agricultural University, Beijing 100083, China.

<sup>b</sup> China Agricultural University Sichuan Chengdu Advanced Agricultural Industrial Institute, Chengdu 611430, China.

<sup>c</sup> Department of Marine Technology, Rizhao Polytechnic, Shandong 276826, China.

<sup>d</sup> College of Forestry and Horticulture, Xinjiang Agricultural University, Xinjiang 830052, China.

Corresponding author at: College of Forestry and Horticulture, Xinjiang Agricultural University, 830052, Xinjiang, China. Email: [zlei\\_xj@sina.com](mailto:zlei_xj@sina.com) (L. Zhang).

Corresponding author at: College of Food Science and Nutritional Engineering, China Agricultural University, 100083, Beijing, China. Email: [lijingming@cau.edu.cn](mailto:lijingming@cau.edu.cn) (J. M. Li).

Process 1. Determination of degree of hydrolysis.

Process 2. Determination of xanthine oxidase inhibitory (XOI) rate.

Process 3. Optimization of enzymatic hydrolysis for Alcalase 2.4 L.

Process 4. Molecular weight determination of SCPH.

Process 5. Peptide identification through LC-MS/MS.

Figure S1. Standard curve of uric acid in HPLC method.

Figure S2. Optimization of enzymatic conditions for Alcalase 2.4 L.

Figure S3. IC<sub>50</sub> diagram of SCPH (A) and allopurinol (B).

Figure S4. Secondary mass spectrum of LGDF and DML.

Figure S5. Total ion chromatogram (TIC) of LC-MS/MS identification.

Figure S6. Quality control evaluation for serum metabolomics analysis. (A) OPLS-DA score plot including QC samples. (B) Correlation analysis among QC samples.

Figure S7. Permutation testing results of OPLS-DA analysis for serum metabolomics.

Figure S8. Permutation testing results of OPLS-DA analysis for gut microbiota.

Table S1. Key parameters applied in the two-step enzymatic hydrolysis.

Table S2. Sources, sequence, and IC<sub>50</sub> of food-derived XOI peptides.

Table S3. Stability of the internal standard in QC samples.

Table S4. Differential metabolites between CK and MD.

Table S5. Differential metabolites between SCPH\_H and MD.

Table S6. Differential metabolites between LGDF\_H and MD.

Table S7. Overall PERMANOVA results.

Table S8. Pairwise PERMANOVA results.

Table S9. Bray–curtis distance results.

## Materials

Hexane (AR), anhydrous ethanol (AR), sodium hydroxide (AR), hydrochloric acid (AR), and pepsin ( $\geq 1.2 \times 10^5$  U/g) was purchased from China National Pharmaceutical Group Corporation. Trypsin ( $\geq 2.5 \times 10^6$  U/g) and alkaline protease ( $\geq 2 \times 10^5$  U/g) were purchased from Shanghai Yuanye Bio-Technology Co., Ltd. Alcalase 2.4 L (protease from *Bacillus licheniformis*,  $> 2.4$  AU/g solution) were obtained from Novozymes (Bagsvaerd, Denmark). Papain ( $\geq 2 \times 10^6$  U/g), O-phthalaldehyde, and phosphate buffered saline (PBS, 1 $\times$ , pH 7.2-7.4) were bought from Biorigin (Beijing) Inc. Serine ( $> 98\%$ ) were purchased from Beijing Solarbio Science & Technology Co., Ltd. Xanthine was purchased from Shanghai Yuanye Technology Co., Ltd. (Shanghai, China). XOD (53.1 U/mg) was purchased from Nanjing Jiancheng Bioengineering Research Institute (Jiangsu, China). All HPLC grade reagents were purchased from Merck Millipore (Billerica, MA, USA). All other reagents were of the highest grade commercially available.

### Process 1. Determination of degree of hydrolysis.

**Measurement of degree of hydrolysis (DH).** The DH was calculated based on the determination of free amino groups by the O-phthalaldehyde (OPA) method as previously described. Serine (0.9516 mol/L) was used as the standard. A total of 400  $\mu$ L of hydrolysate sample or serine standard was mixed with 3 mL OPA reagent for 5 s. The mixture was incubated for 2 min at ambient temperature and the absorbance was measured at 340 nm.

## Process 2. Determination of xanthine oxidase inhibitory (XOI) rate.

**Measurement of xanthine oxidase inhibitory (XOI) rate.** XOI rate assay was conducted according to the method with slight modifications. First, 50  $\mu\text{L}$  of XO (0.1 U/mL) and 50  $\mu\text{L}$  of the samples (protein hydrolysates at a concentration of 20 mg/mL) in PBS buffer (pH 7.2-7.4) were preincubated at 37  $^{\circ}\text{C}$  for 5 min. Then, 150  $\mu\text{L}$  of xanthine solution (0.6 M) was added to start the reaction, which were incubated at 37 $^{\circ}\text{C}$  for 30 min. The reaction was terminated by adding 80  $\mu\text{L}$  of 1 M HCl. SHIMADZU LC-20A equipped with an Agilent dC18 column (250  $\times$  4.6 mm, 5  $\mu\text{m}$ ) was employed for UA content detection. The mobile phase consisting of 85%  $\text{NH}_4\text{H}_2\text{PO}_4$  aqueous solution (10 mM) and 15% methanol was at a flow rate of 0.7 mL/min. The amount of UA in test samples was determined from the absorbance at 290 nm. XO inhibitory percentage (%) =  $[(\text{UA}_{\text{blank}} - \text{UA}_{\text{sample}}) / \text{UA}_{\text{blank}}] \times 100\%$ .

The calibration curve for UA demonstrated excellent linearity ( $y = 31.247x + 622.66$ ,  $R^2 = 0.9905$ ), indicating a reliable response across the concentration range tested (10-300  $\mu\text{g}/\text{mL}$ ).

**Figure S1. Standard curve of uric acid in HPLC method.**

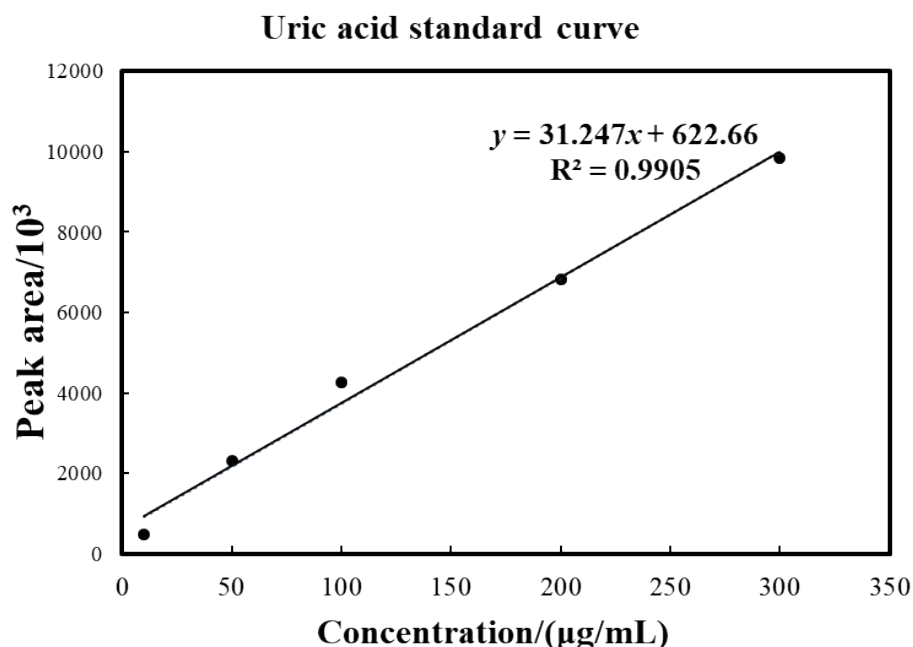

### **Process 3. Optimization of enzymatic hydrolysis for Alcalase 2.4 L.**

**Optimization of the primary hydrolysis.** Sunflower capitulum protein was suspended in distilled water and preheated at 100°C for 15 min to improve the capacity of hydrolysis. Then, Alcalase 2.4 L, pepsin, alkaline protease, papain, and trypsin were added to the mixture at a certain enzyme to substrate ratio under their most suitable reaction conditions, respectively. Meanwhile, pH for the hydrolysis system was maintained with 1 M sodium hydroxide solution. The hydrolysates were then heated at 100°C for 10 min to terminate the reaction and centrifuged. Finally, the supernatants were collected to obtain primary hydrolysates for further detection.

**Optimization of hydrolysis conditions.** Enzyme content, temperature, and pH were considered to optimize the hydrolysis process of sunflower capitulum protein based on the XO1 activity and degree of hydrolysis.

**Optimization of the secondary hydrolysis.** The primary hydrolysate was obtained according to the optimized enzymatic hydrolysis process, pH of which was adjusted by 1 M sodium hydroxide solution or hydrochloric acid solution. Then, pepsin, alkaline protease, papain, and trypsin was added for the second hydrolysis, conditions of which was presented in Table S1. The hydrolysates were then heated at 100°C for 10 min to terminate the reaction and centrifuged for 20 min. Finally, the supernatants were collected to obtain SCPH for further detection.

**Table S1. Key parameters applied in the two-step enzymatic hydrolysis.**

| Protease type               | pH   | Temperature/°C | E/S                        | Reaction time |
|-----------------------------|------|----------------|----------------------------|---------------|
| <b>Primary hydrolysis</b>   |      |                |                            |               |
| Pepsin                      | 3.0  | 37             |                            |               |
| Trypsin                     | 8.0  | 37             |                            |               |
| Papain                      | 7.0  | 40             | 90000 U / 0.1 g<br>protein | 3.0 h         |
| Alkaline Protease           | 10.  | 40             |                            |               |
| Alcalase 2.4 L              | 8.0  | 50             |                            |               |
| <b>Secondary hydrolysis</b> |      |                |                            |               |
| Pepsin                      | 3.0  | 37             |                            |               |
| Trypsin                     | 8.0  | 37             | 90000 U / 0.1g<br>protein  | 3.0 h         |
| Papain                      | 7.0  | 40             |                            |               |
| Alkaline Protease           | 10.0 | 40             |                            |               |

**Figure S2. Optimization of enzymatic conditions for Alcalase 2.4 L.**

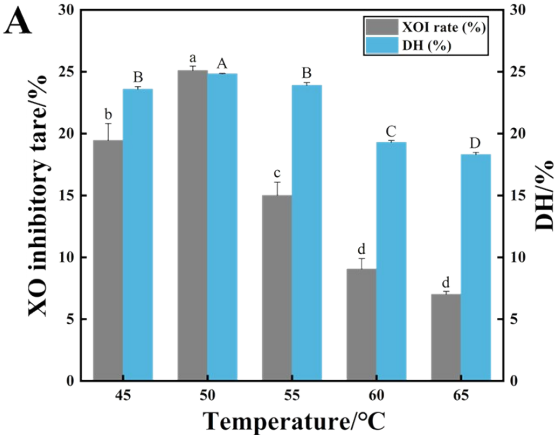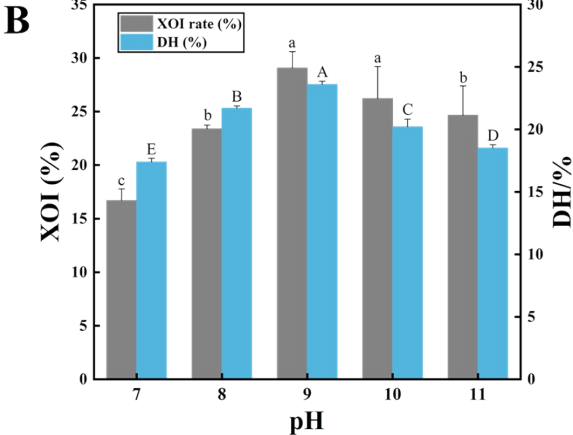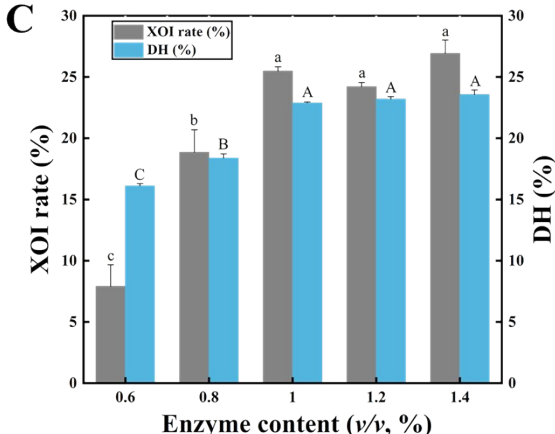

#### **Process 4. Molecular weight determination of SCPH.**

The molecular weight distribution of SCPH was monitored by using a TSK-Gel G2000 SWXL gel filtration column (7.8 mm × 300 mm, Tosoh Corporation, Tokyo, Japan) attached to a Shimadzu LC-20A HPLC system (Shimadzu, Japan). The samples were dissolved in the mobile phase consisting of acetonitrile/water (45/55, v/v) in the presence of 0.1% (v/v) trifluoroacetic acid and the flow rate was set at 0.5 mL/min. The calibration curve was obtained using the following standards from J&K Chemical Ltd.: cytochrome C (12,384 Da), aprotinin (6,510 Da), zinc bacitracin (1,422 Da), Gly-Gly-Tyr-Arg (451 Da) and Gly-Gly-Gly (189 Da). Absorbance at 214 nm was measured.

## Process 5. Peptide identification through LC-MS/MS.

The peptides were re-dissolved in solvent A (0.1% formic acid in water) and analyzed by Orbitrap Exploris 480 coupled to an EASY-nanoLC 1200 system (Thermo Fisher Scientific, MA, USA). Peptide sample (1  $\mu$ L) was loaded onto an Acclaim PepMap C<sub>18</sub> column (75  $\mu$ m  $\times$  25 cm, 1.9  $\mu$ m) and separated with 60 min-gradient starting at 2.2% solvent B (80% ACN with 0.1% FA) followed by a stepwise increase to 50% in 51 min, 90% in 3.5 min and stayed there for 5.5 min. The column flow rate was maintained at 350 nL/min with the column temperature of 40°C. The electrospray voltage was set to 2 kV.

The mass spectrometer was run under data dependent acquisition (DDA) mode, and automatically switched between MS and MS/MS mode. The survey of full scan MS spectra ( $m/z$ : 200-1500) was acquired in the Orbitrap with 60,000 resolutions. The normalized automatic gain control (AGC) target is 300% and the maximum injection time is 25 ms. Then the precursor ions were selected into collision cell for fragmentation by higher-energy collision dissociation (HCD), and the normalized collision energy was 30%. The MS/MS resolution was set at 15,000, the normalized AGC target of 50%, the maximum injection time of 22 ms, and dynamic exclusion was 30 s.

Tandem mass spectra were processed by PEAKS Studio version 10.6 (Bioinformatics Solutions Inc., Waterloo, Canada). The database, *Helianthus annuus* (version 2023, 80941 entries), was downloaded from uniprot. None was set as the digestion enzyme. PEAKS databases were searched with a fragment ion mass tolerance of 0.02 Da and a parent ion tolerance of 10ppm. Oxidation on methionine, deamidation on asparagine and glutamine were specified as variable modifications. The peptides with  $-10\lg P \geq 20$  and the proteins containing at least one unique peptide were filtered.

Figure S3. IC<sub>50</sub> diagram of SCPH (A) and allopurinol (B).

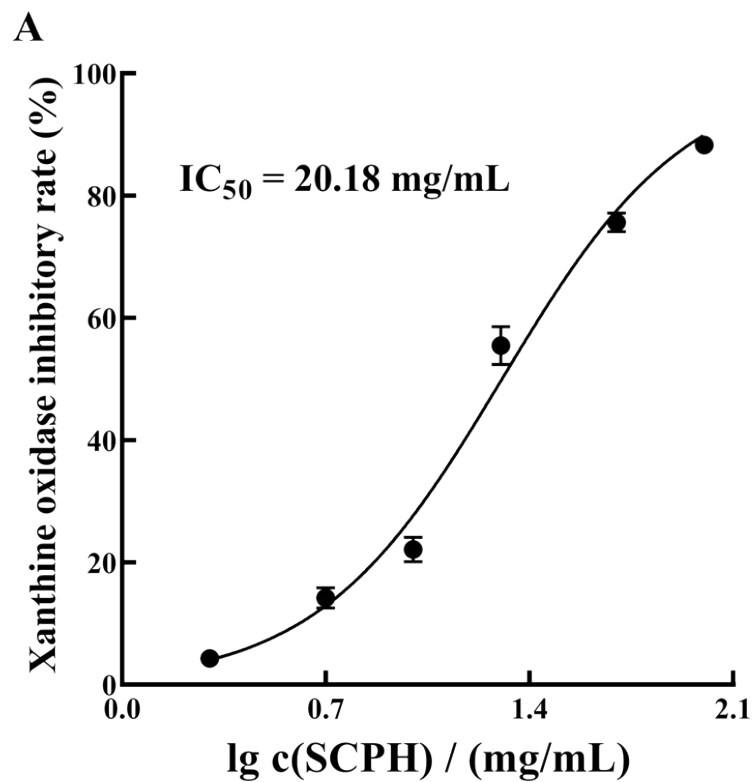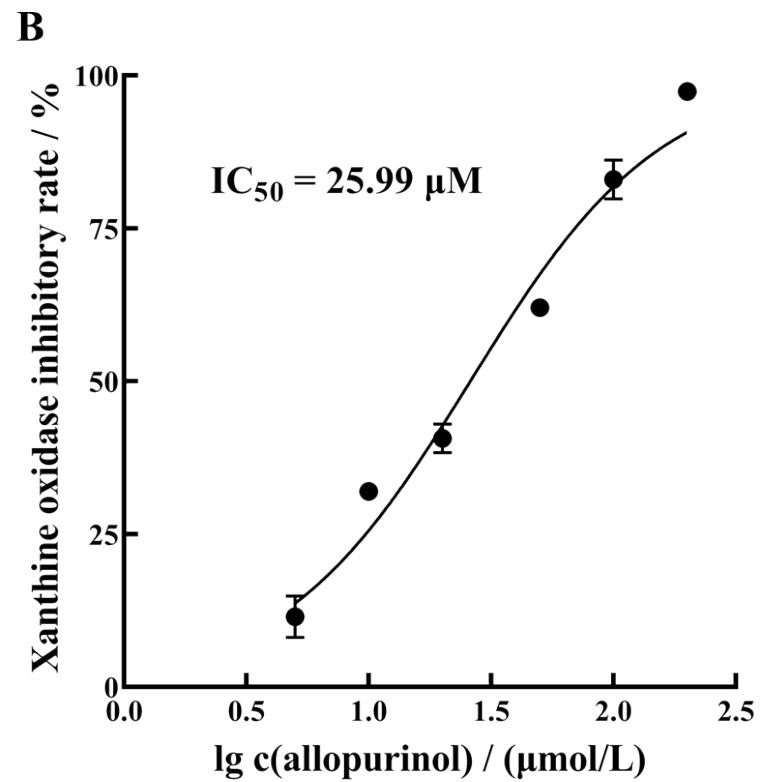

**Figure S4. Secondary mass spectrum of LGDF and DML.**

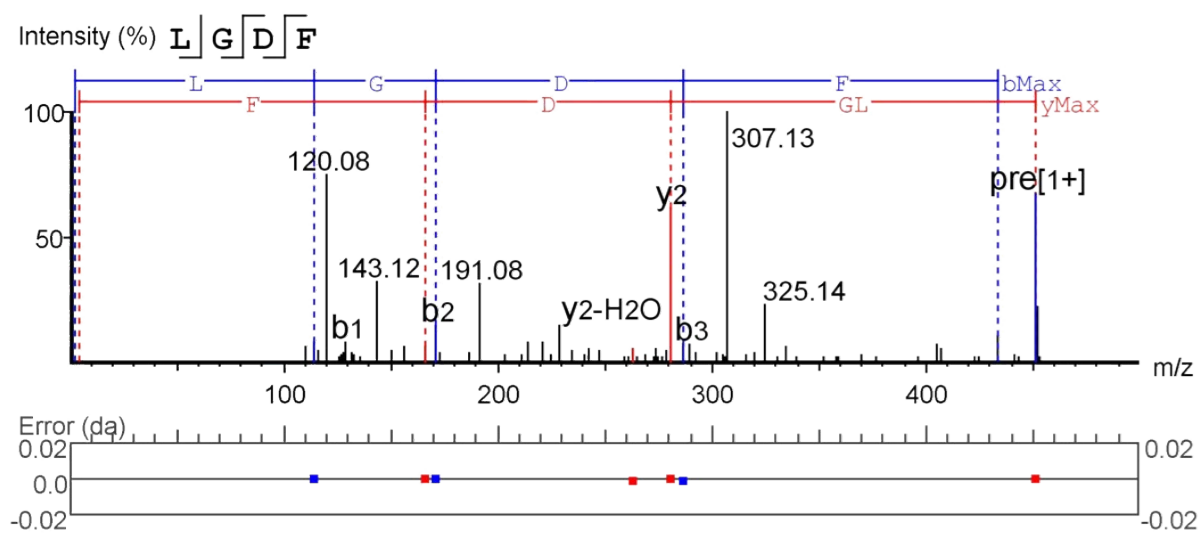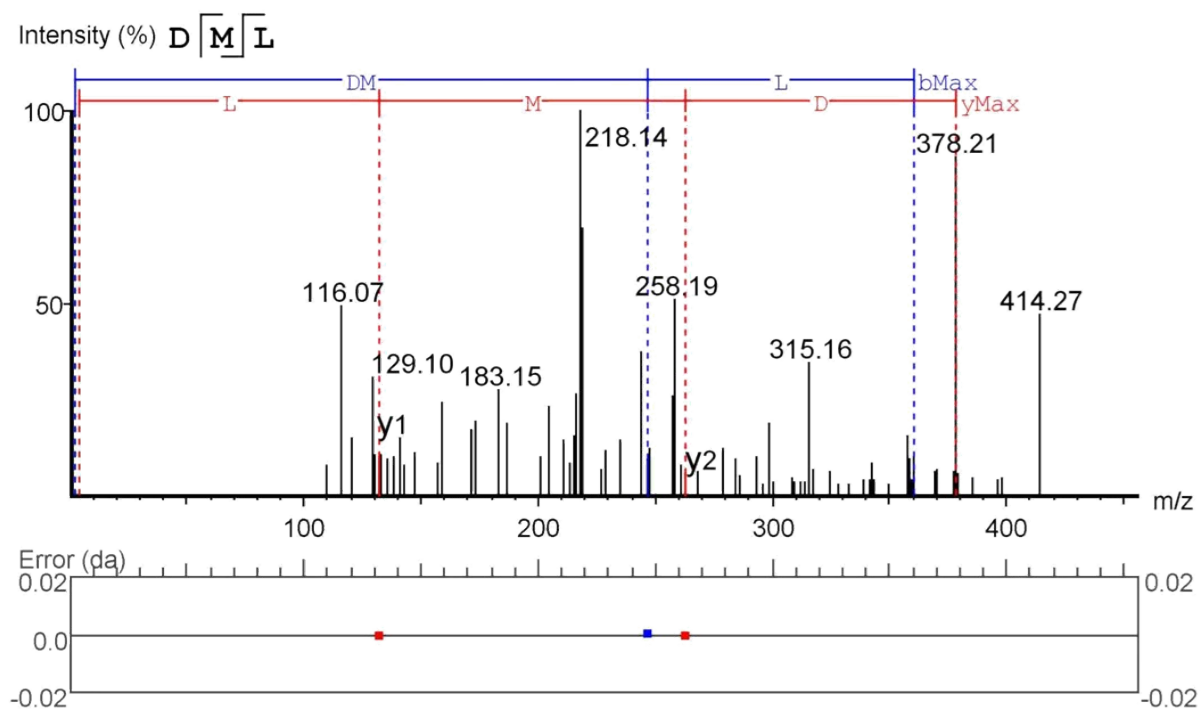

Figure S5. Total ion chromatogram (TIC) of LC-MS/MS identification.

RT: 0.00 - 60.00

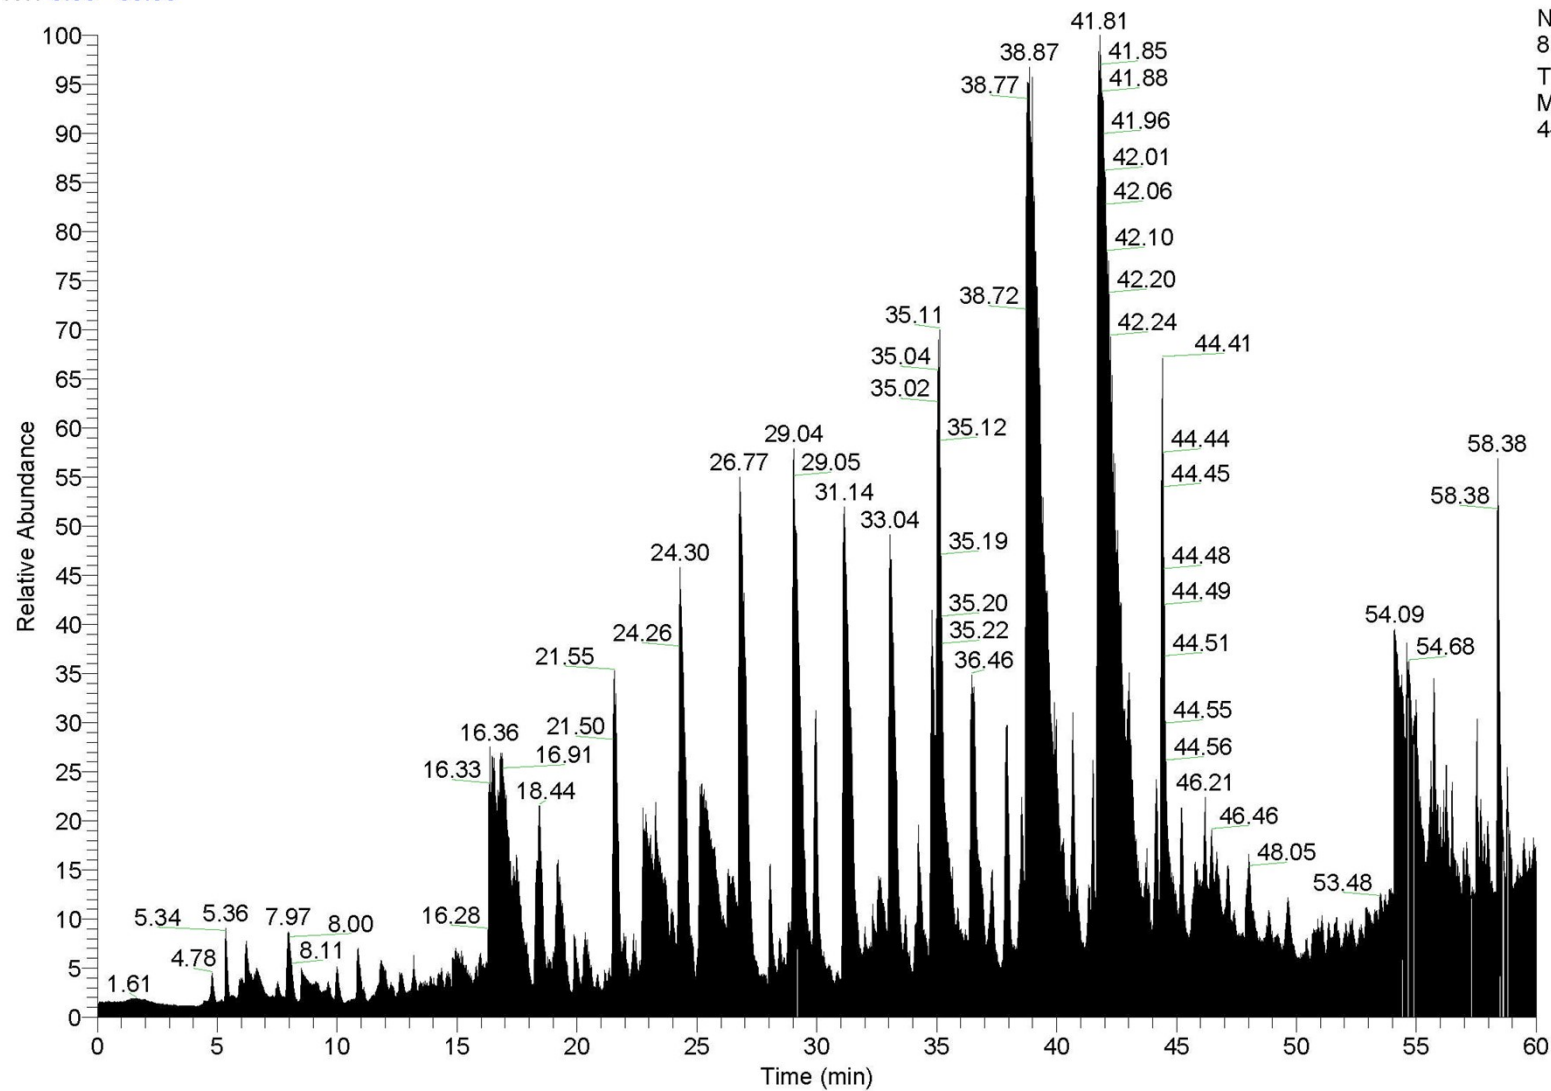

NL:  
8.46E10  
TIC MS  
MS2024010  
4-B

**Figure S6. Quality control evaluation for serum metabolomics analysis. (A) OPLS-DA score plot including QC samples. (B) Correlation analysis among QC samples.**

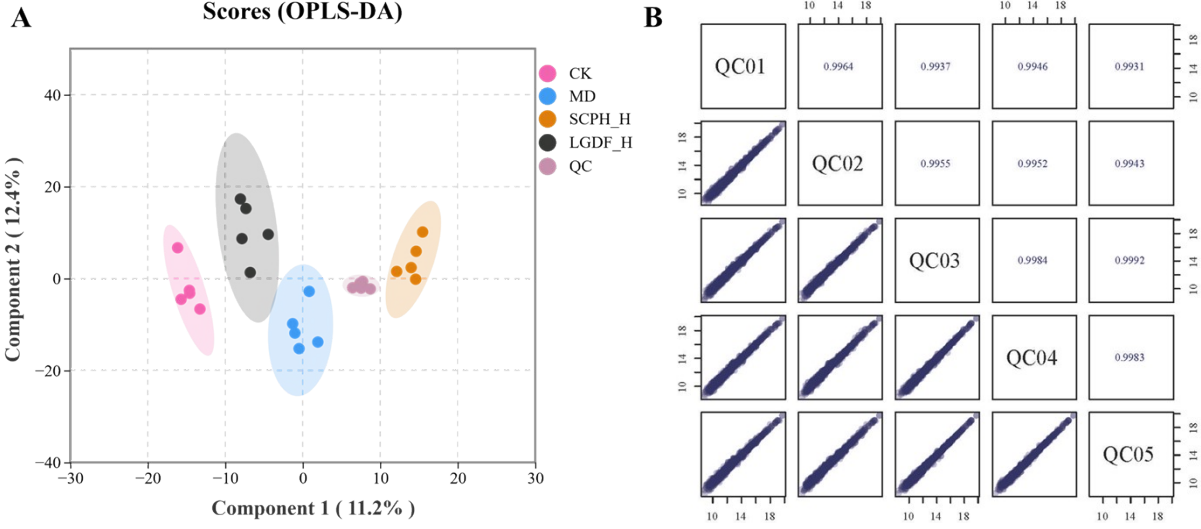

**Figure S7. Permutation testing results of OPLS-DA analysis for serum metabolomics.**

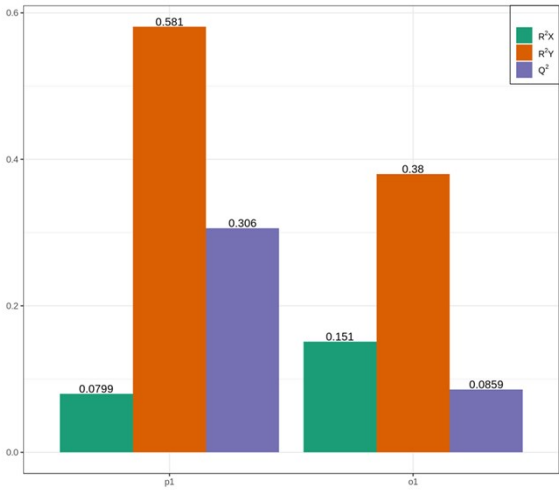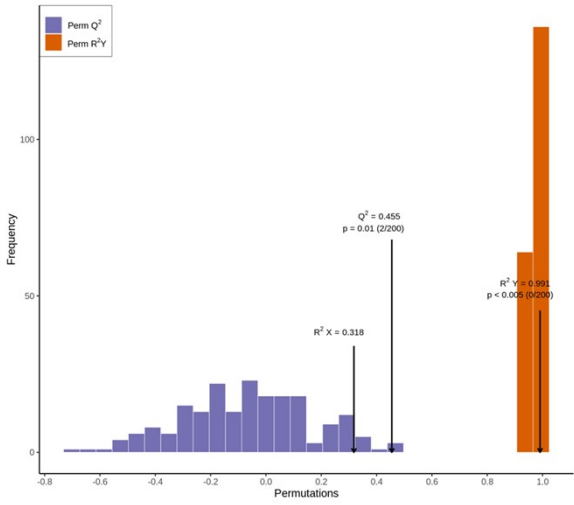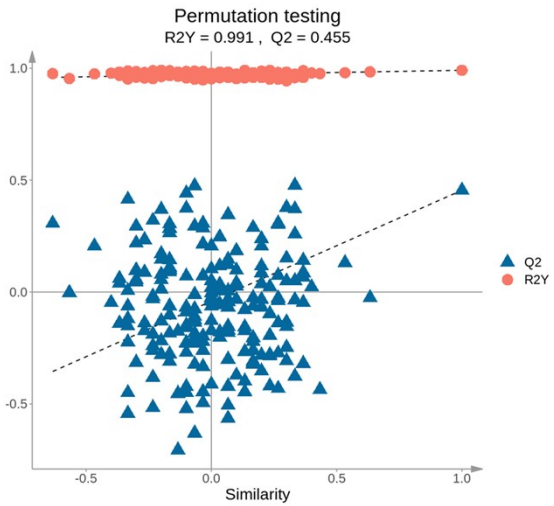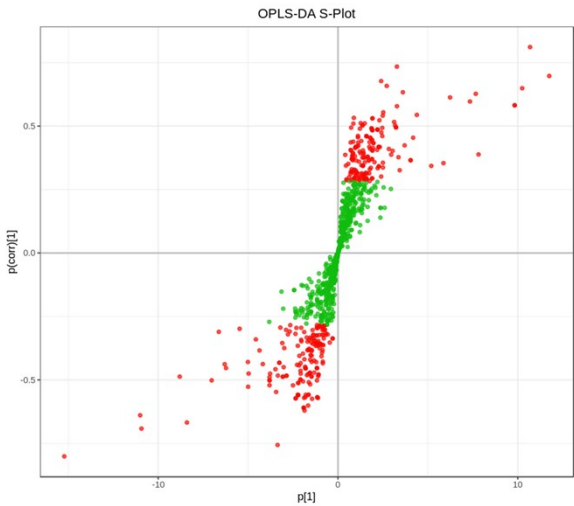

**Figure S8. Permutation testing results of OPLS-DA analysis for gut microbiota.**

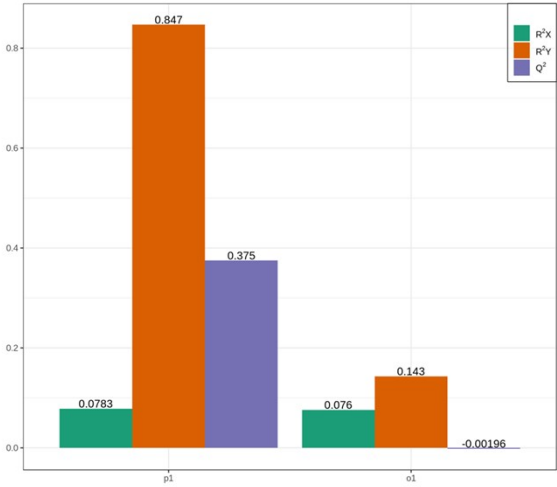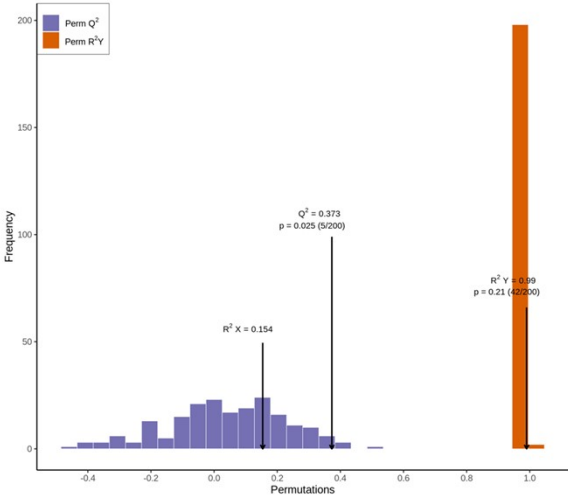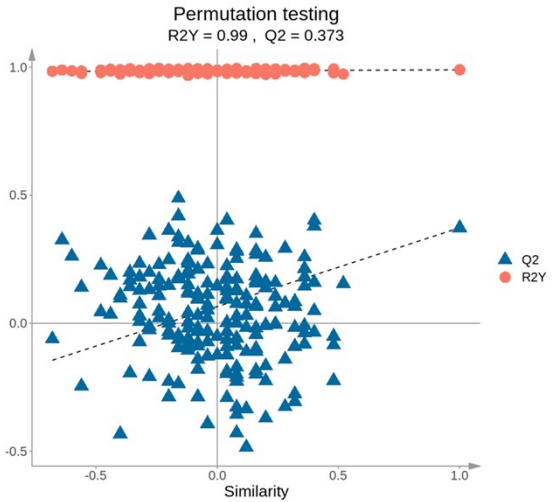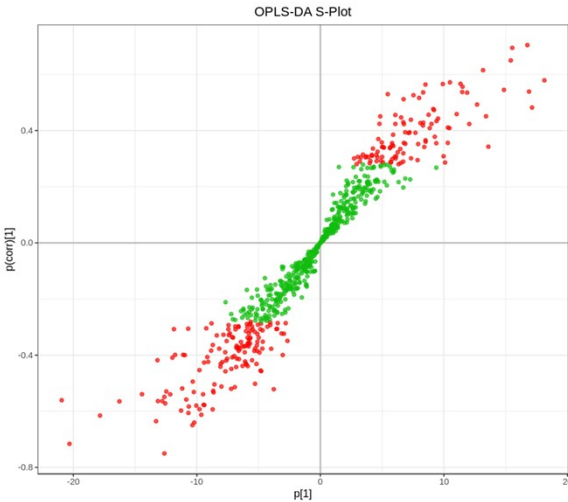

**Table S2. Sources, sequence, and IC<sub>50</sub> of food-derived XOI peptides**

| Sources                                      | Peptide sequence                                     | IC <sub>50</sub>   | Reference |
|----------------------------------------------|------------------------------------------------------|--------------------|-----------|
| Walnut                                       | WPPKN (Trp-Pro-Pro-Lys-Asn)                          | 17.75 ± 0.12 mg/mL | 1         |
|                                              | ADIYTE (Ala-Asp-Ile-Tyr-Thr-Glu)                     | 19.01 ± 0.23 mg/mL |           |
| Macadamia nut                                | PGPR (Pro-Gly-Pro-Arg)                               | 24.84 ± 0.02 mM    | 2         |
|                                              | HGGR (His-Gly-Gly-Arg)                               | 24.89 ± 0.19 mM    |           |
|                                              | GPY (Gly-Pro-Tyr)                                    | 30.44 ± 0.33 mM    |           |
| Small yellow croaker                         | WDDMEKIW (Trp-Asp-Asp-Met-Glu-Lys-Ile-Trp)           | 3.16 ± 0.03 mM     | 3         |
|                                              | APPERKYSVW (Ala-Pro-Pro-Glu-Arg-Lys-Tyr-Ser-Val-Trp) | 5.86 ± 0.02 mM     |           |
| <i>Auxis thazard</i>                         | PDL (Pro-Asp-Leu)                                    | 4.37 ± 0.11 mg/mL  | 4         |
|                                              | SVGGAL (Ser-Val-Gly-Gly-Ala-Leu)                     | 5.59 ± 0.09 mg/mL  | 5         |
| Tuna                                         | FH (Phe-His)                                         | 25.7 mM            | 6         |
| <i>Katsuwonus pelamis</i><br>(Skipjack tuna) | ACECD (Ala-Cys-Glu-Cys-Asp)                          | 13.4 mM            | 7         |
| Pacific cod                                  | FF (Phe-Phe)                                         | 0.52 mM            | 8         |
|                                              | YF (Tyr-Phe)                                         | 0.80 mM            |           |
|                                              | WPW (Trp-Pro-Trp)                                    | 1.68 mM            |           |
|                                              | WPDARG (Trp-Pro-Asp-Ala-Arg-Gly)                     | 0.40 mM            |           |
|                                              | YNVTGW (Tyr-Asn-Val-Thr-Gly-Trp)                     | 0.23 mM            |           |
| <i>Trachinotus ovatus</i>                    | FPAW (Phe-Pro-Ala-Trp)                               | 3.81 ± 0.18 mM     | 9         |
|                                              | LLPW (Leu-Leu-Pro-Trp)                               | 4.17 ± 0.12 mM     |           |
| <i>Ostrea rivularis</i><br>Gould             | ALSGSW (Ala-Leu-Ser-Gly-Ser-Trp)                     | 2.17 ± 0.09 mM     | 10        |
|                                              | GGYGIF (Gly-Gly-Tyr-Gly-Ile-Phe)                     | 4.28 ± 0.43 mM     |           |
|                                              | MAIGLW (Met-Ala-Ile-Gly-Leu-Trp)                     | 3.48 ± 0.09 mM     |           |

## Continue Table S2

| Sources                                    | Peptide sequence                                          | IC <sub>50</sub> | Reference |
|--------------------------------------------|-----------------------------------------------------------|------------------|-----------|
| Pacific White Shrimp and Swimming Crab     | AEAQMWR (Ala-Glu-Ala-Gln-Met-Trp-Arg)                     | 8.85 ± 0.05 mM   | 11        |
| Pacific white shrimp                       | AGDY (Ala-Gly-Asp-Tyr)                                    | 21.82 ± 0.15 mM  | 12        |
|                                            | GDEY (Gly-Asp-Glu-Tyr)                                    | 20.67 ± 0.30 mM  |           |
|                                            | YNITGW (Tyr-Asn-Ile-Thr-Gly-Trp)                          | 9.78 ± 0.13 mM   |           |
|                                            | PDARG (Pro-Asp-Ala-Arg-Gly)                               | 35.01 ± 1.18 mM  |           |
| Whey protein                               | ALPM (Ala-Leu-Pro-Met)                                    | 7.23 ± 0.22 mM   | 13        |
|                                            | LWM (Leu-Trp-Met)                                         | 5.01 ± 0.31 mM   | 14        |
|                                            | PEW (Pro-Glu-Trp)                                         | 3.46 ± 0.22 mM   |           |
|                                            | LLW (Leu-Leu-Trp)                                         | 3.02 ± 0.17 mM   |           |
| $\alpha$ -lactalbumin and colostrum casein | VYPPFGPI (Val-Tyr-Pro-Phe-Pro-Gly-Pro-Ile)                | 5.75 ± 0.12 mM   |           |
|                                            | GPVRGPFPIIV (Gly-Pro-Val-Arg-Gly-Pro-Phe-Pro-Ile-Ile-Val) | 4.67 ± 0.24 mM   |           |
|                                            | AVFPSIVGR (Ala-Val-Phe-Pro-Ser-Ile-Val-Gly-Arg)           | 5.04 ± 0.24 mM   |           |
|                                            | YPWTQ (Tyr-Pro-Trp-Thr-Gln)                               | 0.97 ± 0.03 mM   |           |
|                                            | LITGLW (Leu-Ile-Thr-Gly-Leu-Trp)                          | 1.09 ± 0.03 mM   |           |
| Egg                                        | EEK (Glu-Glu-Lys)                                         | 0.14 mM          | 16        |
| <i>Pleurotus ostreatus</i>                 | FCH (Phe-Cys-His)                                         | 0.90 mg/mL       | 17        |
| Feather Keratin                            | GNQQVHLQSQDM                                              | 12.15 mg/mL      | 18        |
| Hemoglobin                                 | IVYYPW (Ile-Val-Tyr-Pro-Trp)                              | 0.63 ± 0.03 mM   | 19        |
|                                            | YPWTQ (Tyr-Pro-Trp-Thr-Gln)                               | 0.97 ± 0.03 mM   |           |
|                                            | LITGLW (Leu-Ile-Thr-Gly-Leu-Trp)                          | 1.09 ± 0.03 mM   |           |

## References:

- 1 Q. Li, X. Kang, C. Shi, Y. Li, K. Majumder, Z. Ning, J. Ren, Moderation of hyperuricemia in rats via consuming walnut protein hydrolysate diet and identification of new antihyperuricemic peptides, *Food Funct*, 2018, **9**, 107-116.
- 2 L. Zhao, X. Ai, F. Pan, N. Zhou, L. Zhao, S. Cai, X. Tang, Novel peptides with xanthine oxidase inhibitory activity identified from macadamia nuts: integrated in silico and in vitro analysis, *Eur Food Res Technol*, 2022, **248**, 2031-2042.
- 3 X. Chen, W. Guan, Y. Li, J. Zhang, L. Cai, Xanthine oxidase inhibitory peptides from *Larimichthys polyactis*: Characterization and *in vitro/in silico* evidence, *Foods*, 2023, **12**, 982.
- 4 Y. Li, X. Kang, Q. Li, et al., Anti-hyperuricemic peptides derived from bonito hydrolysates based on in vivo hyperuricemic model and in vitro xanthine oxidase inhibitory activity, *Peptides*, 2018, **107**, 45-53.
- 5 L. Wei, H. Ji, W. Song, et al., Identification and molecular docking of two novel peptides with xanthine oxidase inhibitory activity from *Auxis thazard*, *Food Sci Tech*, 2022, **42**, e106921.
- 6 W. He, G. Su, D. Sun-Waterhouse, G.I.N. Waterhouse, M. Zhao, Y. Liu, *In vivo* anti-hyperuricemic and xanthine oxidase inhibitory properties of tuna protein hydrolysates and its isolated fractions, *Food Chem*, 2019, **272**, 453-461.
- 7 H. Zhong, Abdullah, Y. Zhang, et al., Exploring the potential of novel xanthine oxidase inhibitory peptide (ACECD) derived from Skipjack tuna hydrolysates using affinity-ultrafiltration coupled with HPLC–MALDI-TOF/TOF-MS, *Food Chem*, 2021, **347**, 129068.
- 8 Q. Zhao, Y. Meng, J. Liu, Z. Hu, Y. Du, J. Sun, X. Mao, Separation, identification and docking analysis of xanthine oxidase inhibitory peptides from pacific cod bone-flesh mixture, *LWT*, 2022, **167**, 113862.
- 9 M.F. Hou, H. Xiang, X. Hu, S.J. Chen, Y.Y. Wu, J.C. Xu, X.Q. Yang, Novel potential XOD inhibitory peptides derived from *Trachinotus ovatus*: Isolation, identification and structure-

- function analysis, *Food Biosci*, 2022, **47**.
- 10 Q. Zhao, X. Jiang, Z. Mao, J. Zhang, J. Sun, X. Mao, Exploration, sequence optimization and mechanism analysis of novel xanthine oxidase inhibitory peptide from *Ostrea rivularis* Gould, *Food Chem*, 2023, **404**, 134537.
  - 11 Z. Mao, H. Jiang, X. Mao, Identification and anti-hyperuricemic activity of xanthine oxidase inhibitory peptides from pacific white shrimp and swimming crab based on molecular docking screening, *J Agr Food Chem*, 2023, **71**, 1620-1627.
  - 12 Z. Mao, H. Jiang, J. Sun, X. Mao, Virtual screening and structure optimization of xanthine oxidase inhibitory peptides from whole protein sequences of Pacific white shrimp via molecular docking, *Food Chem*, 2023, **429**, 136837.
  - 13 X. Qi, H. Chen, K. Guan, Y. Sun, R. Wang, Q. Li, Y. Ma, Novel xanthine oxidase inhibitory peptides derived from whey protein: identification, in vitro inhibition mechanism and in vivo activity validation, *Bioorg Chem*, 2022, **128**, 106097.
  - 14 X. Qi, H. Chen, K. Guan, Y. Sun, R. Wang, Y. Ma, Identification, inhibitory mechanism and transepithelial transport of xanthine oxidase inhibitory peptides from whey protein after simulated gastrointestinal digestion and intestinal absorption, *Food Res Int*, 2022, **162**, 111959.
  - 15 Y.F. Gao, M.Q. Liu, Z.H. Li, et al., Purification and identification of xanthine oxidase inhibitory peptides from enzymatic hydrolysate of  $\alpha$ -lactalbumin and bovine colostrum casein, *Food Res Int*, 2023, **169**, 112882.
  - 16 Z. Yu, Y. Cao, R. Kan, et al., Identification of egg protein-derived peptides as xanthine oxidase inhibitors: virtual hydrolysis, molecular docking, and in vitro activity evaluation, *Food Sci Human Well*, 2022, **11**, 1591-1597.
  - 17 I.T. Jang, S.H. Hyun, J.W. Shin, Y.H. Lee, J.H. Ji, J.S. Lee, Characterization of an anti-gout xanthine oxidase inhibitor from *Pleurotus ostreatus*, *Mycobiology*, 2014, **42**, 296-300.
  - 18 X.D. Pei, F. Li, Y.M. Zhang, et al., Preparation, purification, and identification of novel feather keratin-derived peptides with antioxidative and xanthine oxidase inhibitory activities, *J Agr Food Chem*, 2023, **71**, 8061-8070.

- 19 P. Zhang, Z. Jiang, J. Lei, Q. Yan, C. Chang, Novel hemoglobin-derived xanthine oxidase inhibitory peptides: Enzymatic preparation and inhibition mechanisms, *J Funct Foods*, 2023, **102**, 105459.

**Table S3. Stability of the internal standard in QC samples.**

| <b>Compounds</b>                          | <b>Q1 (Da)</b> | <b>RT (min)</b> | <b>CV</b> | <b>CAS</b>  | <b>Concentration (mg/L)</b> | <b>Brand</b>   |
|-------------------------------------------|----------------|-----------------|-----------|-------------|-----------------------------|----------------|
| L-Leucine-D7                              | 139.1464       | 1.14            | 0.028275  | 92751-17-2  | 1                           | isoreag        |
| L-Tryptophan-d5                           | 210.1291       | 2.4             | 0.024499  | 62595-11-3  | 0.5                         | isoreag        |
| Hexanoic Acid-D11                         | 126.145        | 5.12            | 0.068963  | 95348-44-0  | 1                           | isoreag        |
| Octanoic acid-13C                         | 144.1106       | 6.46            | 0.032438  | 200-813-2   | 1                           | isoreag        |
| benzoic acid d5                           | 126.0614       | 4.43            | 0.015013  | 1079-02-3   | 1                           | sigma          |
| caffeine 13C3                             | 198.0982       | 2.99            | 0.029074  | 58-08-2     | 0.2                         | Chembind LLC   |
| 2-Amino-3-(2-Chlorophenyl) Propanoic Acid | 198.0322       | 2.48            | 0.025515  | 103616-89-3 | 0.2                         | J&K Scientific |
| (S)-4-Fluorophenylglycine                 | 170.0617       | 1.2             | 0.014454  | 19883-57-9  | 1                           | TCI            |

**Table S4. Differential metabolites between CK and MD.**

| Compound                                          | KEGG_ID | Fold Change | Log <sub>2</sub> (FC) | P value     | VIP         |
|---------------------------------------------------|---------|-------------|-----------------------|-------------|-------------|
| Ala-Pro                                           | C00107  | 9.861906717 | 3.301866607           | 5.50189E-11 | 2.784896394 |
| Orotic Acid                                       | C00295  | 4.766573092 | 2.252952419           | 4.06596E-05 | 2.571813748 |
| Inositol 1-phosphate                              | -       | 1.845194925 | 0.883773229           | 0.000161173 | 2.465658409 |
| Uracil 5-carboxylic acid                          | C03030  | 8.748324936 | 3.129006807           | 0.000171837 | 2.571439336 |
| Gly-Gly-Phe                                       | C00098  | 0.624733159 | -0.67868799           | 0.000531405 | 2.359597735 |
| 5-hydroxyindole-2-carboxylic acid                 | -       | 0.663050985 | -0.592808286          | 0.00200703  | 2.222379352 |
| 7-ketodeoxycholic acid                            | C04643  | 32.4165471  | 5.018658523           | 0.002933944 | 2.411885588 |
| Nicotinuric Acid                                  | C05380  | 0.624668883 | -0.678836429          | 0.003813001 | 2.147933103 |
| Bovinic acid                                      | C04056  | 0.373866542 | -1.419404728          | 0.005524117 | 2.232425639 |
| 9,10-Dihydroxyoctadec-12-enoic acid (9,10-DiHOME) | C14828  | 1.519740449 | 0.603824952           | 0.007200387 | 2.069783004 |
| 12,13-DiHOME                                      | -       | 1.519740449 | 0.603824952           | 0.007200387 | 2.069783004 |
| 9,10-Epoxy-18-hydroxyoctadecanoic acid            | -       | 1.519740449 | 0.603824952           | 0.007200387 | 2.069783004 |
| Carnosic acid                                     | C21818  | 0.099305854 | -3.331977422          | 0.008015601 | 2.230429532 |
| Ureidosuccinic acid                               | C00438  | 2.770083871 | 1.469929658           | 0.008121054 | 2.146182715 |
| Uric acid                                         | C00366  | 2.25823944  | 1.175198463           | 0.008396824 | 2.002986312 |
| 11-Cis-Retinol                                    | C00899  | 0.282109176 | -1.825674505          | 0.008803528 | 2.185767622 |
| (R)-2-Hydroxybutyric acid                         | C05984  | 1.643575552 | 0.716837776           | 0.009068881 | 2.11162858  |
| 2-Methylactic acid                                | C21297  | 1.643575552 | 0.716837776           | 0.009068881 | 2.11162858  |
| 2-Pentyl-3-phenyl-2-propenal                      | C12288  | 0.58297578  | -0.778492147          | 0.014471274 | 1.907708765 |
| Lysophosphatidylcholine (17:0) (LPC (17:0/0:0))   | C04230  | 0.635572931 | -0.653870413          | 0.029969296 | 1.831160243 |
| LPC (0:0/17:0)                                    | C04230  | 0.635572931 | -0.653870413          | 0.029969296 | 1.831160243 |
| LPC (O-20:1)                                      | C04230  | 11.9194885  | 3.575250421           | 0.033778355 | 1.875200246 |
| Histamine                                         | C00388  | 0.601894752 | -0.732416857          | 0.034832623 | 1.733000499 |
| Phosphatidylethanolamine lyso alkenyl 18:3        | C04438  | 0.650765035 | -0.619791358          | 0.034917645 | 1.784018017 |
| Xanthosine                                        | C01762  | 1.683368955 | 0.751351416           | 0.036985999 | 1.682373577 |
| 3-N-Methyl-L-Histidine                            | C01152  | 1.525214139 | 0.60901181            | 0.046057736 | 1.666825877 |

**Table S5. Differential metabolites between SCPH and MD.**

| Compound                                        | KEGG_ID | Fold Change | Log <sub>2</sub> (FC) | P value     | VIP         |
|-------------------------------------------------|---------|-------------|-----------------------|-------------|-------------|
| DL-Glyceraldehyde 3-Phosphate                   | C00661  | 26.34720228 | 4.71957787            | 1.07681E-07 | 2.185530465 |
| Phenoxyacetic acid                              | C02181  | 0.064182176 | -3.961683493          | 1.35067E-05 | 2.148152898 |
| Cyclo (Pro-Phe)                                 | C11847  | 1.603083751 | 0.6808498             | 0.000105192 | 1.973488841 |
| Cyclo (Phe-Pro)                                 | C00107  | 1.603083751 | 0.6808498             | 0.000105192 | 1.973488841 |
| 3-(4-Hydroxyphenyl)-1-propanol                  | -       | 0.574793433 | -0.798884516          | 0.000162344 | 1.921362314 |
| Visnagin                                        | C09049  | 2.156588672 | 1.108751037           | 0.000167767 | 1.935711867 |
| 9, 10-DiHOME                                    | C14828  | 2.232380539 | 1.158582975           | 0.000223651 | 1.903923615 |
| 12, 13-DiHOME                                   | -       | 2.232380539 | 1.158582975           | 0.000223651 | 1.903923615 |
| 9, 10-Epoxy-18-hydroxyoctadecanoic acid         | -       | 2.232380539 | 1.158582975           | 0.000223651 | 1.903923615 |
| Free fatty acids (15:1) (FFA (15:1))            | C00162  | 0.339041143 | -1.56046774           | 0.000297914 | 1.894316494 |
| 9, 10-dihydroxystearic acid                     | C19622  | 1.742663977 | 0.801294414           | 0.000426697 | 1.887493615 |
| 9(S)-HODE                                       | C14767  | 2.441145903 | 1.287558525           | 0.000542296 | 1.855502054 |
| Lysophosphatidylcholine (P-16:0) (LPE (P-16:0)) | C04438  | 1.845761839 | 0.884216412           | 0.000961826 | 1.813442749 |
| N <sup>l</sup> -Methyl-2-pyridone-5-carboxamide | C05842  | 0.532871272 | -0.908141037          | 0.001060397 | 1.825061661 |
| Ethylparaben                                    | D01647  | 0.141759828 | -2.818479333          | 0.001265453 | 1.812771978 |
| Arg-Val                                         | C00107  | 0.553214641 | -0.854088756          | 0.001352743 | 1.810182187 |
| 2,4-Dihydroxyacetophenone 5-sulfate             | -       | 0.448056777 | -1.158246536          | 0.001474237 | 1.859054682 |
| LPC (O-16:1)                                    | C04230  | 2.02476261  | 1.017752771           | 0.001483015 | 1.861422187 |
| 4-Hydroxy-3-methylbenzoic acid                  | C21167  | 0.578967381 | -0.788446026          | 0.00153975  | 1.768804362 |
| 2-hydroxyphenylacetic acid                      | C05852  | 0.578967381 | -0.788446026          | 0.00153975  | 1.768804362 |
| Palatinose                                      | C01742  | 0.629805957 | -0.667020692          | 0.001585215 | 1.81511244  |
| 9-oxoODE                                        | C14766  | 2.392708249 | 1.258644495           | 0.001668635 | 1.76431364  |
| Cyclo (gly-glu)                                 | C00107  | 0.598996001 | -0.739381723          | 0.0016852   | 1.755341437 |
| (R)-(-)-Mandelic acid                           | C01983  | 0.500377201 | -0.998912037          | 0.002125312 | 1.766195359 |
| 13(R)-HODE                                      | -       | 2.511353488 | 1.328465111           | 0.0022571   | 1.72681051  |
| LPE (0:0/16:1)                                  | C04438  | 0.582860582 | -0.778777256          | 0.002369244 | 1.726062778 |
| LPE (16:1/0:0)                                  | C04438  | 0.582860582 | -0.778777256          | 0.002369244 | 1.726062778 |
| N4-Acetylcytidine                               | C22293  | 0.390826891 | -1.35539836           | 0.002393858 | 1.72570263  |
| Pro-Asn                                         | C00107  | 0.603686246 | -0.728129162          | 0.002643819 | 1.713700395 |
| Cyclo (Pro-Val)                                 | C00107  | 1.554612695 | 0.636555202           | 0.002768817 | 1.718716153 |
| LPC (O-18:0)                                    | C04317  | 2.539684268 | 1.344649153           | 0.002988609 | 1.789989446 |
| 7-ketodeoxycholic acid                          | C04643  | 30.25556194 | 4.919128475           | 0.003221545 | 1.868208703 |
| N-Acetylneuraminic Acid                         | C19910  | 0.580008524 | -0.785853993          | 0.003590257 | 1.67817876  |
| cis-9,10-Epoxyoctadecanoic Acid (cis-EODA)      | C19418  | 4.298266077 | 2.103754793           | 0.003626175 | 1.726149661 |
| LPC (O-18:2)                                    | C04230  | 1.550207043 | 0.632460912           | 0.003661707 | 1.729834352 |
| Proline-Hydroxyproline                          | C00107  | 0.633971786 | -0.657509458          | 0.005067047 | 1.652526343 |
| LPC (0:0/20:2)                                  | C04230  | 1.984898846 | 0.989065487           | 0.005092961 | 1.716771658 |
| LPC (20:2/0:0)                                  | C04230  | 1.984898846 | 0.989065487           | 0.005092961 | 1.716771658 |

**Continued Table S5.**

| <b>Compound</b>                         | <b>KEGG_ID</b> | <b>Fold Change</b> | <b>Log<sub>2</sub> (FC)</b> | <b>P value</b> | <b>VIP</b>  |
|-----------------------------------------|----------------|--------------------|-----------------------------|----------------|-------------|
| Biotin                                  | C00120         | 0.512123604        | -0.965436039                | 0.005153894    | 1.660963524 |
| Leu-Met                                 | C00107         | 1.655526603        | 0.727290194                 | 0.00522895     | 1.670963187 |
| Ile-Met                                 | C00107         | 1.655526603        | 0.727290194                 | 0.00522895     | 1.670963187 |
| 2-Furoylglycine                         | -              | 0.48006802         | -1.05868926                 | 0.005997194    | 1.643376254 |
| Genipin                                 | C09780         | 1.962416902        | 0.972631564                 | 0.006268132    | 1.67449582  |
| Pyrroloquinoline Quinone                | C00113         | 1.814593056        | 0.859646043                 | 0.006643478    | 1.675262991 |
| N6-Isopentenyladenosine                 | D05726         | 1.750092242        | 0.807430964                 | 0.006681263    | 1.602608903 |
| 2-Naphthol                              | C11713         | 0.573420504        | -0.802334603                | 0.006711735    | 1.634355361 |
| 1-Naphthol                              | C11714         | 0.573420504        | -0.802334603                | 0.006711735    | 1.634355361 |
| LPE (P-18:1)                            | C04438         | 2.192248084        | 1.132411069                 | 0.006939872    | 1.707862464 |
| LPE (0:0/20:5)                          | C04438         | 0.63375889         | -0.657994015                | 0.007088083    | 1.721620939 |
| LPE (20:5/0:0)                          | C04438         | 0.63375889         | -0.657994015                | 0.007088083    | 1.721620939 |
| 5-Hydroxy-2'-deoxyuridine               | -              | 0.593105781        | -0.753638662                | 0.007430508    | 1.585866861 |
| Bovinic acid                            | C04056         | 3.306206496        | 1.725176834                 | 0.007735361    | 1.644872465 |
| Equol                                   | C14131         | 3.575008571        | 1.837946701                 | 0.008178228    | 1.651830322 |
| 2-Pentyl-3-phenyl-2-propenal            | C12288         | 1.698374127        | 0.764154299                 | 0.00819937     | 1.598317837 |
| Cholic acid                             | C00695         | 2.214825894        | 1.147193294                 | 0.008700765    | 1.56485208  |
| Gamma-Mercholic Acid                    | C17649         | 2.214825894        | 1.147193294                 | 0.008700765    | 1.56485208  |
| 3-Methylequuric acid                    | -              | 0.579892854        | -0.786141735                | 0.008895684    | 1.61203895  |
| 4-Methylhippuric Acid                   | -              | 0.579892854        | -0.786141735                | 0.008895684    | 1.61203895  |
| Pro-Ile                                 | C00107         | 2.381767056        | 1.25203232                  | 0.010892654    | 1.568880221 |
| Cyclo (Pro-Leu)                         | C00107         | 2.234974261        | 1.160258217                 | 0.0111048      | 1.547653148 |
| 1-Methylguanosine                       | C04545         | 0.666278417        | -0.585802934                | 0.011517976    | 1.576018479 |
| 2-Methylguanosine                       | -              | 0.666278417        | -0.585802934                | 0.011517976    | 1.576018479 |
| 7-Methylguanosine                       | -              | 0.666278417        | -0.585802934                | 0.011517976    | 1.576018479 |
| Cyclo (pro-pro)                         | C00107         | 1.87525059         | 0.907083396                 | 0.012421833    | 1.531990793 |
| 3-N-Methyl-L-Histidine                  | C01152         | 0.647874775        | -0.626213108                | 0.012907718    | 1.535779126 |
| γ-Glu-Met                               | C00107         | 1.578211509        | 0.658290566                 | 0.015054668    | 1.500728909 |
| FFA (18:1)                              | C00712         | 0.105224326        | -3.248459826                | 0.018390118    | 1.609772575 |
| Glycerol 3-Phosphate                    | C03189         | 1.500459852        | 0.585404717                 | 0.018934413    | 1.475887215 |
| Succinic anhydride                      | C19524         | 0.578815696        | -0.788824051                | 0.019997149    | 1.518483353 |
| LPC (17:0/0:0)                          | C04230         | 1.892150439        | 0.920026797                 | 0.020331457    | 1.496788972 |
| LPC (0:0/17:0)                          | C04230         | 1.892150439        | 0.920026797                 | 0.020331457    | 1.496788972 |
| Elenaic acid                            | -              | 0.665692977        | -0.587071146                | 0.020932775    | 1.454826961 |
| Diocetyl phthalate                      | -              | 3.144093623        | 1.652644178                 | 0.021356187    | 1.454996601 |
| Homovanillic Acid sulfate (sodium salt) | -              | 1.845130745        | 0.883723049                 | 0.022463544    | 1.489949954 |
| Cytochalasin H                          | -              | 0.573262496        | -0.802732198                | 0.022575066    | 1.478285784 |
| 2-Aminoethanesulfinic Acid              | C00519         | 1.923362065        | 0.94363037                  | 0.022687166    | 1.445138429 |
| Phenylacetyl-L-Glutamine                | C04148         | 0.617358507        | -0.695819572                | 0.023912844    | 1.405924814 |
| Hyodeoxycholic acid                     | C15517         | 2.349221763        | 1.232182908                 | 0.025352843    | 1.432349792 |
| alpha-Muricholic acid                   | C17647         | 2.977534321        | 1.574118137                 | 0.025933636    | 1.432055976 |

**Continued Table S5.**

| <b>Compound</b>                   | <b>KEGG_ID</b> | <b>Fold Change</b> | <b>Log<sub>2</sub> (FC)</b> | <b>P value</b> | <b>VIP</b>  |
|-----------------------------------|----------------|--------------------|-----------------------------|----------------|-------------|
| beta-Muricholic acid              | C17726         | 2.977534321        | 1.574118137                 | 0.025933636    | 1.432055976 |
| 2,4-Di-tert-butylphenol           | -              | 0.552680073        | -0.855483497                | 0.027200423    | 1.383914917 |
| 4-tert-Octylphenol                | C14205         | 0.552680073        | -0.855483497                | 0.027200423    | 1.383914917 |
| Scopolamine-methyl-bromide        | -              | 1.566796684        | 0.64781798                  | 0.028380677    | 1.413171966 |
| p-Cresol glucuronide              | -              | 0.094572412        | -3.402436797                | 0.030380941    | 1.49043582  |
| Carnitine C22:3                   | C02301         | 1.586850227        | 0.666165967                 | 0.034297183    | 1.354083066 |
| Cyclo (his-pro)                   | C00107         | 0.428604327        | -1.22228168                 | 0.03435057     | 1.417145001 |
| DL-3-Phenyllactic acid            | C01479         | 1.630521319        | 0.705333304                 | 0.036129798    | 1.330840465 |
| Tropate                           | C01456         | 1.630521319        | 0.705333304                 | 0.036129798    | 1.330840465 |
| 1-Aminocyclobutanecarboxylic acid | -              | 1.562361512        | 0.643728315                 | 0.038493831    | 1.334287866 |
| L-Proline                         | C00148         | 1.562361512        | 0.643728315                 | 0.038493831    | 1.334287866 |
| LPC (16:4/0:0)                    | C04230         | 13.91273525        | 3.798334177                 | 0.038654548    | 1.462168979 |
| Carnitine C22:4                   | C02301         | 1.520787307        | 0.604818396                 | 0.038794266    | 1.322689503 |
| Gly-Phe                           | C00107         | 4.41437327         | 2.142208626                 | 0.040550119    | 1.386215201 |
| Phe-Gly                           | C00107         | 4.41437327         | 2.142208626                 | 0.040550119    | 1.386215201 |
| Corticosterone                    | C02140         | 0.352332862        | -1.504989054                | 0.042313525    | 1.339300494 |
| 21-Deoxycortisol                  | C05497         | 0.352332862        | -1.504989054                | 0.042313525    | 1.339300494 |
| Ureidosuccinic acid               | C00438         | 0.562295753        | -0.830598945                | 0.043020493    | 1.308375223 |
| 3-Guanidinopropionic acid         | C03065         | 1.920572776        | 0.941536632                 | 0.044412176    | 1.526372272 |
| Glu-Val-Phe                       | C00098         | 1.786344988        | 0.837010728                 | 0.04737626     | 1.296524449 |
| Cyclo (leu-phe)                   | C20519         | 3.153824658        | 1.657102453                 | 0.047422069    | 1.268790194 |
| DI-3, 4-Dihydroxymandelic Acid    | C05580         | 2.038582849        | 1.02756659                  | 0.048610623    | 1.279659907 |

**Table S6. Differential metabolites between LGDF\_H and MD.**

| Compound                                                                       | KEGG_ID | Fold Change | Log <sub>2</sub> (FC) | P value     | VIP         |
|--------------------------------------------------------------------------------|---------|-------------|-----------------------|-------------|-------------|
| Hypotaurocyamine                                                               | C02419  | 0.128292524 | -2.962490992          | 6.34E-06    | 2.227440725 |
| Phenoxyacetic acid                                                             | C02181  | 0.067979004 | -3.87876697           | 6.24645E-05 | 2.181795345 |
| LPC (O-16:1)                                                                   | C04230  | 2.38281921  | 1.252669495           | 0.000355697 | 1.925948803 |
| 2-Pentyl-3-phenyl-2-propenal                                                   | C12288  | 2.305720555 | 1.205217674           | 0.000383571 | 1.920293963 |
| 9,10-dihydroxystearic acid                                                     | C19622  | 1.970371727 | 0.978467832           | 0.000518613 | 1.911369304 |
| Cinnabarinic acid                                                              | C05640  | 70.34810917 | 6.136439742           | 0.000935028 | 2.096072544 |
| 9, 10-DiHOME                                                                   | C14828  | 1.930588365 | 0.94904059            | 0.001264297 | 1.831499052 |
| 12, 13-DiHOME                                                                  | -       | 1.930588365 | 0.94904059            | 0.001264297 | 1.831499052 |
| 9, 10-Epoxy-18-hydroxyoctadecanoic acid                                        | -       | 1.930588365 | 0.94904059            | 0.001264297 | 1.831499052 |
| 9(S)-HODE                                                                      | C14767  | 2.773894379 | 1.471912855           | 0.001287344 | 1.8753609   |
| LPE (P-16:0)                                                                   | C04438  | 1.903561829 | 0.92870143            | 0.001366753 | 1.832840099 |
| 13(R)-HODE                                                                     | -       | 2.754631672 | 1.461859426           | 0.001380318 | 1.826017735 |
| Ethylparaben                                                                   | D01647  | 0.171113082 | -2.54697803           | 0.001559525 | 1.893753783 |
| 2-Methylhippuric acid                                                          | C01586  | 0.621985288 | -0.685047639          | 0.001649685 | 1.800375442 |
| N-Phenylacetyl glycine                                                         | C05598  | 0.621985288 | -0.685047639          | 0.001649685 | 1.800375442 |
| LPC (O-18:0)                                                                   | C04317  | 2.704050276 | 1.435121976           | 0.001679985 | 1.836377235 |
| LPC (O-18:3)                                                                   | C04230  | 1.608348506 | 0.685580052           | 0.00179398  | 1.935383673 |
| LPE (0:0/20:5)                                                                 | C04438  | 0.524808513 | -0.930136971          | 0.001992984 | 1.818656922 |
| LPE (20:5/0:0)                                                                 | C04438  | 0.524808513 | -0.930136971          | 0.001992984 | 1.818656922 |
| 4-Hydroxy-3-methylbenzoic acid                                                 | C21167  | 0.437963267 | -1.191118223          | 0.002152394 | 1.837708569 |
| 2-hydroxyphenylacetic acid                                                     | C05852  | 0.437963267 | -1.191118223          | 0.002152394 | 1.837708569 |
| Leu-Leu-Leu                                                                    | C00098  | 0.651597322 | -0.61794742           | 0.00260684  | 1.865315032 |
| LPC (0:0/20:2)                                                                 | C04230  | 2.188958164 | 1.130244381           | 0.002820635 | 1.868439401 |
| LPC (20:2/0:0)                                                                 | C04230  | 2.188958164 | 1.130244381           | 0.002820635 | 1.868439401 |
| p-Cresol glucuronide                                                           | -       | 0.175889655 | -2.507257461          | 0.003151228 | 1.881328695 |
| 3-Guanidinopropionic acid                                                      | C03065  | 3.422789689 | 1.775172649           | 0.003477732 | 1.963883149 |
| LPC (17:0/0:0)                                                                 | C04230  | 2.406963683 | 1.267214374           | 0.003568455 | 1.772418346 |
| LPC (0:0/17:0)                                                                 | C04230  | 2.406963683 | 1.267214374           | 0.003568455 | 1.772418346 |
| Pantothenol                                                                    | C05944  | 0.084473915 | -3.565350278          | 0.003841913 | 1.806374804 |
| Pyrroloquinoline Quinone (10E,12Z)-9-oxooctadeca-10,12-dienoic acid (9-oxoODE) | C14766  | 2.20952266  | 1.143734727           | 0.005671604 | 1.705606493 |
| 3-(4-Hydroxyphenyl)-1-propanol                                                 | -       | 0.457160787 | -1.129226433          | 0.007035934 | 1.739295931 |
| LPE (P-18:1)                                                                   | C04438  | 2.153286055 | 1.106539988           | 0.007077657 | 1.690873389 |
| LPE (0:0/15:0)                                                                 | C04438  | 1.529223882 | 0.612799636           | 0.008189725 | 1.812496337 |
| LPC (O-18:2)                                                                   | C04230  | 1.601959099 | 0.679837313           | 0.008384241 | 1.627009996 |
| gamma-Glu-Ala                                                                  | C03740  | 1.52330943  | 0.607209027           | 0.008488554 | 1.64489861  |
| LPC (O-14:1)                                                                   | C04230  | 1.69321382  | 0.759764169           | 0.009025508 | 1.655145486 |
| 3-Methylequuric acid                                                           | -       | 0.55451227  | -0.850708711          | 0.010050176 | 1.59230122  |
| 4-Methylhippuric Acid                                                          | -       | 0.55451227  | -0.850708711          | 0.010050176 | 1.59230122  |
| Polycarbonate (8:0/8:0) (PC (8:0/8:0))                                         | C00157  | 1.746919657 | 0.804813258           | 0.010144471 | 1.593277889 |

**Continued Table S6.**

| <b>Compound</b>                     | <b>KEGG_ID</b> | <b>Fold Change</b> | <b>Log<sub>2</sub> (FC)</b> | <b>P value</b> | <b>VIP</b>  |
|-------------------------------------|----------------|--------------------|-----------------------------|----------------|-------------|
| 4-Hexylaniline                      | -              | 1.681752917        | 0.74996576                  | 0.01066059     | 1.598603291 |
| Bovinic acid                        | C04056         | 3.090203268        | 1.627701739                 | 0.011134136    | 1.650119838 |
| Met-Glu                             | C00107         | 1.741578938        | 0.800395865                 | 0.011625202    | 1.573904232 |
| LPE (22:3/0:0)                      | C04438         | 0.584490704        | -0.774748015                | 0.01364695     | 1.563149404 |
| Quinic acid                         | C00296         | 0.657136146        | -0.605735795                | 0.014114784    | 1.562577859 |
| (±)17-HDHA                          | -              | 2.195105517        | 1.134290291                 | 0.014454491    | 1.535913987 |
| Carnitine C22:3                     | C02301         | 1.533272819        | 0.616614422                 | 0.015723707    | 1.522660145 |
| N6, N6, N6-Trimethyl-L-lysine       | C03793         | 0.620558466        | -0.688360955                | 0.017916123    | 1.5134899   |
| 2-Phenylglycine                     | -              | 0.621837203        | -0.685391162                | 0.017998556    | 1.511910703 |
| Pinolenic acid                      | -              | 0.543981993        | -0.8783692                  | 0.018459564    | 1.545844341 |
| FFA (18:3)                          | C06426         | 0.543981993        | -0.8783692                  | 0.018459564    | 1.545844341 |
| N-Acetylglucosamine 1-Phosphate     | C04256         | 0.542317907        | -0.882789287                | 0.018983541    | 1.538187498 |
| 5'-Deoxy-5'-(Methylthio) Adenosine  | C00170         | 0.51827735         | -0.94820375                 | 0.01910734     | 1.597429259 |
| 2,4-Dihydroxyacetophenone 5-sulfate | -              | 0.467194719        | -1.09790413                 | 0.01987266     | 1.516846077 |
| Pro-Ile                             | C00107         | 2.269487023        | 1.182366239                 | 0.020089627    | 1.513612713 |
| Glu-Met                             | C00107         | 1.667064126        | 0.737309601                 | 0.02050197     | 1.486887312 |
| γ-Glu-Met                           | C00107         | 1.76695302         | 0.821263682                 | 0.022180121    | 1.479310607 |
| Cholic acid                         | C00695         | 2.04587878         | 1.032720667                 | 0.02319946     | 1.479626361 |
| Gamma-Mercholic Acid                | C17649         | 2.04587878         | 1.032720667                 | 0.02319946     | 1.479626361 |
| Ubiquinone-1                        | C00399         | 1.927260598        | 0.946551661                 | 0.027502049    | 1.459674531 |
| N'-Methyl-2-pyridone-5-carboxamide  | C05842         | 0.528223206        | -0.920780411                | 0.028233492    | 1.474269782 |
| Allantoin                           | C01551         | 0.549904638        | -0.862746641                | 0.02847004     | 1.492556695 |
| Ribosyladenosine                    | -              | 0.591251354        | -0.758156513                | 0.028698853    | 1.465220186 |
| Xanthine                            | C00385         | 0.375398168        | -1.413506487                | 0.029009502    | 1.414658672 |
| 4-acetoxyphenol                     | C13636         | 0.375398168        | -1.413506487                | 0.029009502    | 1.414658672 |
| FFA (12:0)                          | C02679         | 0.647376946        | -0.627322104                | 0.029162566    | 1.450534259 |
| LPC (18:0/0:0)                      | C04230         | 1.649971437        | 0.72244105                  | 0.029853567    | 1.446136155 |
| Pro-Asn                             | C00107         | 0.623321673        | -0.681951217                | 0.030300645    | 1.443879593 |
| LPE (0:0/16:1)                      | C04438         | 0.635103962        | -0.654935325                | 0.030735895    | 1.418899142 |
| LPE (16:1/0:0)                      | C04438         | 0.635103962        | -0.654935325                | 0.030735895    | 1.418899142 |
| 7-ketodeoxycholic acid              | C04643         | 6.170709327        | 2.625436338                 | 0.030992743    | 1.396165175 |
| 3-(4-hydroxyphenyl) acrylaldehyde   | C05608         | 0.583205734        | -0.77792319                 | 0.032526933    | 1.416967225 |
| L-Theanine                          | C01047         | 1.887245458        | 0.916282074                 | 0.033472718    | 1.444097665 |
| N-Alpha-Acetyl-L-Asparagine         | -              | 1.887245458        | 0.916282074                 | 0.033472718    | 1.444097665 |
| Hyodeoxycholic acid                 | C15517         | 2.219793667        | 1.150425582                 | 0.033907591    | 1.441647522 |
| Glycerol 3-Phosphate                | C03189         | 1.567316215        | 0.648296281                 | 0.034017308    | 1.439663583 |
| Chrysophanol                        | C10315         | 2.232093253        | 1.158397301                 | 0.037271789    | 1.391301119 |
| Leu-Leu-Gly                         | C00098         | 0.615059363        | -0.701202436                | 0.039136605    | 1.369976581 |

**Continued Table S6.**

| <b>Compound</b>                                                                                    | <b>KEGG_ID</b> | <b>Fold Change</b> | <b>Log<sub>2</sub> (FC)</b> | <b>P value</b> | <b>VIP</b>  |
|----------------------------------------------------------------------------------------------------|----------------|--------------------|-----------------------------|----------------|-------------|
| Hispidol                                                                                           | C08644         | 2.170790742        | 1.118220661                 | 0.039315657    | 1.375698452 |
| N4-Acetylcytidine                                                                                  | C22293         | 0.519887986        | -0.943727279                | 0.040186136    | 1.372296006 |
| Cyclo (Pro-Leu)                                                                                    | C00107         | 2.077412168        | 1.054787482                 | 0.041890494    | 1.381997088 |
| Proline-Hydroxyproline                                                                             | C00107         | 0.616113179        | -0.698732699                | 0.04454706     | 1.364296855 |
| Arg-Val                                                                                            | C00107         | 0.59041879         | -0.760189458                | 0.044712529    | 1.444066669 |
| Hexaethylene-glycol<br>(9Z,11E,15Z)-13-<br>hydroxyoctadeca-9,11,15-<br>trienoic acid<br>(13-HOTrE) | -              | 0.452870441        | -1.142829719                | 0.046162696    | 1.404058285 |
|                                                                                                    | -              | 1.908267632        | 0.932263522                 | 0.047685576    | 1.316927736 |
| Glu-Val-Phe                                                                                        | C00098         | 1.689044476        | 0.756207318                 | 0.048005867    | 1.30824753  |
| FFA (14:1)                                                                                         | C08322         | 0.577274174        | -0.792671412                | 0.049084448    | 1.295667502 |
| Visnagin                                                                                           | C09049         | 1.581843703        | 0.661607059                 | 0.049848601    | 1.355259569 |

**Table S7. Overall PERMANOVA results.**

|                      |                        |
|----------------------|------------------------|
| <b>Distance</b>      | Bray-Curtis            |
| <b>Groups_tested</b> | CK, MD, SCPH_H, LGDF_H |
| <b>N_total</b>       | 20                     |
| <b>Pseudo-F</b>      | 1.494645               |
| <b>R2</b>            | 0.2189                 |
| <b>P_value</b>       | 0.0052                 |
| <b>df_between</b>    | 3                      |
| <b>df_within</b>     | 16                     |
| <b>SS_between</b>    | 0.93555                |
| <b>SS_within</b>     | 3.338318               |
| <b>SS_total</b>      | 4.273868               |

**Table S8. Pairwise PERMANOVA results.**

| <b>Group1</b> | <b>Group2</b> | <b>n1</b> | <b>n2</b> | <b>Pseudo-F</b> | <b>R2</b> | <b>P_value</b> | <b>FDR_BH</b> |
|---------------|---------------|-----------|-----------|-----------------|-----------|----------------|---------------|
| CK            | LGDF_H        | 5         | 5         | 1.721252        | 0.177061  | 0.0318         | 0.0477        |
| CK            | MD            | 5         | 5         | 1.440232        | 0.152563  | 0.0091         | 0.0273        |
| CK            | SCPH_H        | 5         | 5         | 2.525188        | 0.239919  | 0.0091         | 0.0273        |
| LGDF_H        | MD            | 5         | 5         | 0.944606        | 0.105606  | 0.4467         | 0.4467        |
| LGDF_H        | SCPH_H        | 5         | 5         | 1.083939        | 0.119325  | 0.3513         | 0.42156       |
| MD            | SCPH_H        | 5         | 5         | 1.523267        | 0.159952  | 0.0176         | 0.0352        |

**Table S9. Bray–curtis distance results.**

| <b>Group</b> | <b>mean</b> | <b>std</b> | <b>median</b> | <b>min</b> | <b>max</b> | <b>count</b> |
|--------------|-------------|------------|---------------|------------|------------|--------------|
| CK           | 0.571892    | 0.075633   | 0.566111      | 0.403794   | 0.678542   | 10           |
| LGDF_H       | 0.657567    | 0.099208   | 0.666227      | 0.405647   | 0.739882   | 10           |
| MD           | 0.724133    | 0.114577   | 0.773647      | 0.515019   | 0.865122   | 10           |
| SCPH_H       | 0.596013    | 0.068971   | 0.613219      | 0.499908   | 0.680876   | 10           |
